# Supplementary material
Source: ML conference proceedings conference paper supplement (https://openaccess.thecvf.com/content/CVPR2021/html/Kim_High-Quality_Stereo_Image_CVPR_2021_paper.html)

# High-Quality Stereo Image Restoration from Double refraction

CVPR 2021

Hakyeon Kim   Andreas Meuleman   Daniel S. Jeon   Min H. Kim

KAIST

# Network Architecture

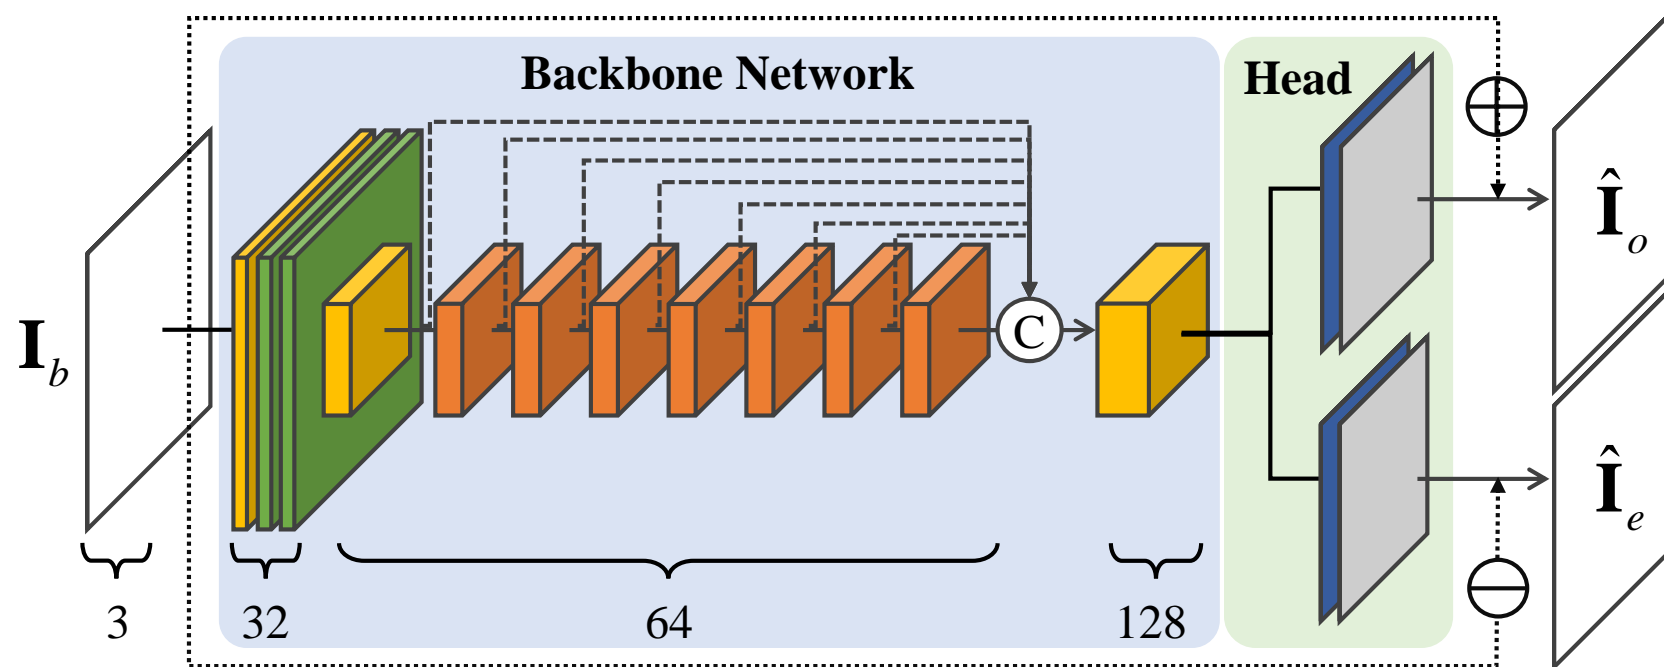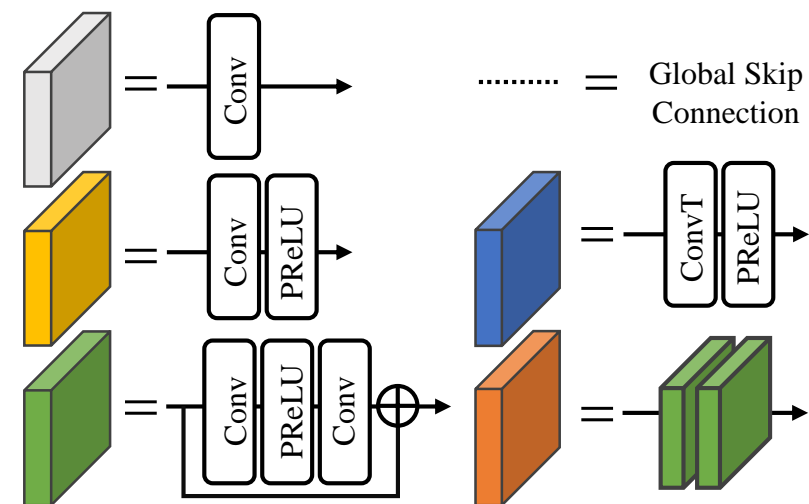

# Network Architecture

|                        | Layer name | Input                                                                                             | Layer operation                                                                           | Activation | (channels , kernel size, stride, dilation) | Output name (size)                                                |
|------------------------|------------|---------------------------------------------------------------------------------------------------|-------------------------------------------------------------------------------------------|------------|--------------------------------------------|-------------------------------------------------------------------|
| Backbone<br>Network    | conv0_0    | RGB image ( $3 \times H \times W$ )                                                               | Conv2d                                                                                    | PReLU      | (32, 3, 1, 1)                              | out0_0 ( $32 \times H \times W$ )                                 |
|                        | conv0_1    | out0_0                                                                                            | $\text{ResBlock} \begin{bmatrix} 3 \times 3, 32 \\ 3 \times 3, 32 \end{bmatrix} \times 2$ | PReLU      | (32, 3, 1, 1)                              | out0_1 ( $32 \times H \times W$ )                                 |
|                        | conv0_2    | out0_1                                                                                            | Conv2d                                                                                    | PReLU      | (64, 3, 2, 1)                              | out0_2 ( $64 \times \frac{H}{2} \times \frac{W}{2}$ )             |
|                        | block1     | out0_2                                                                                            | $\text{ResBlock} \begin{bmatrix} 3 \times 3, 64 \\ 3 \times 3, 64 \end{bmatrix} \times 2$ | PReLU      | (64, 3, 1, 1)                              | out1 ( $64 \times \frac{H}{2} \times \frac{W}{2}$ )               |
|                        | block2     | out1                                                                                              | $\text{ResBlock} \begin{bmatrix} 3 \times 3, 64 \\ 3 \times 3, 64 \end{bmatrix} \times 2$ | PReLU      | (64, 3, 1, 1)                              | out2 ( $64 \times \frac{H}{2} \times \frac{W}{2}$ )               |
|                        | block3     | out2                                                                                              | $\text{ResBlock} \begin{bmatrix} 3 \times 3, 64 \\ 3 \times 3, 64 \end{bmatrix} \times 2$ | PReLU      | (64, 3, 1, 1)                              | out3 ( $64 \times \frac{H}{2} \times \frac{W}{2}$ )               |
|                        | block4     | out3                                                                                              | $\text{ResBlock} \begin{bmatrix} 3 \times 3, 64 \\ 3 \times 3, 64 \end{bmatrix} \times 2$ | PReLU      | (64, 3, 1, 1)                              | ou4 ( $64 \times \frac{H}{2} \times \frac{W}{2}$ )                |
|                        | block5     | out4                                                                                              | $\text{ResBlock} \begin{bmatrix} 3 \times 3, 64 \\ 3 \times 3, 64 \end{bmatrix} \times 2$ | PReLU      | (64, 3, 1, 1)                              | out5 ( $64 \times \frac{H}{2} \times \frac{W}{2}$ )               |
|                        | block6     | out5                                                                                              | $\text{ResBlock} \begin{bmatrix} 3 \times 3, 64 \\ 3 \times 3, 64 \end{bmatrix} \times 2$ | PReLU      | (64, 3, 1, 1)                              | out6 ( $64 \times \frac{H}{2} \times \frac{W}{2}$ )               |
|                        | block7     | out6                                                                                              | $\text{ResBlock} \begin{bmatrix} 3 \times 3, 64 \\ 3 \times 3, 64 \end{bmatrix} \times 2$ | PReLU      | (64, 3, 1, 1)                              | out7 ( $64 \times \frac{H}{2} \times \frac{W}{2}$ )               |
|                        | branch     | [out0_2, out1, out2, out3,out4, out5, out6, out7] ( $512 \times \frac{H}{2} \times \frac{W}{2}$ ) | Conv2d                                                                                    | PReLU      | (128, 3, 1, 1)                             | $feat_{backbone}$ ( $128 \times \frac{H}{2} \times \frac{W}{2}$ ) |
| Head<br>Network<br>(E) | head_e_0   | $feat_{backbone}$                                                                                 | ConvTranspose2d                                                                           | PReLU      | (3, 3, 2, 1)                               | tconv_e                                                           |
|                        | head_e_1   | tconv_e                                                                                           | Conv2d                                                                                    | -          | (1, 3, 1, 1)                               | image_e                                                           |
| Head<br>Network<br>(O) | head_o_0   | $feat_{backbone}$                                                                                 | ConvTranspose2d                                                                           | PReLU      | (3, 3, 2, 1)                               | tconv_o                                                           |
|                        | head_o_1   | tconv_o                                                                                           | Conv2d                                                                                    | -          | (1, 3, 1, 1)                               | image_o                                                           |

# Example Thumbnails of Our Training Dataset

(Synthesized from labeled NYU-Depth v2 Dataset)

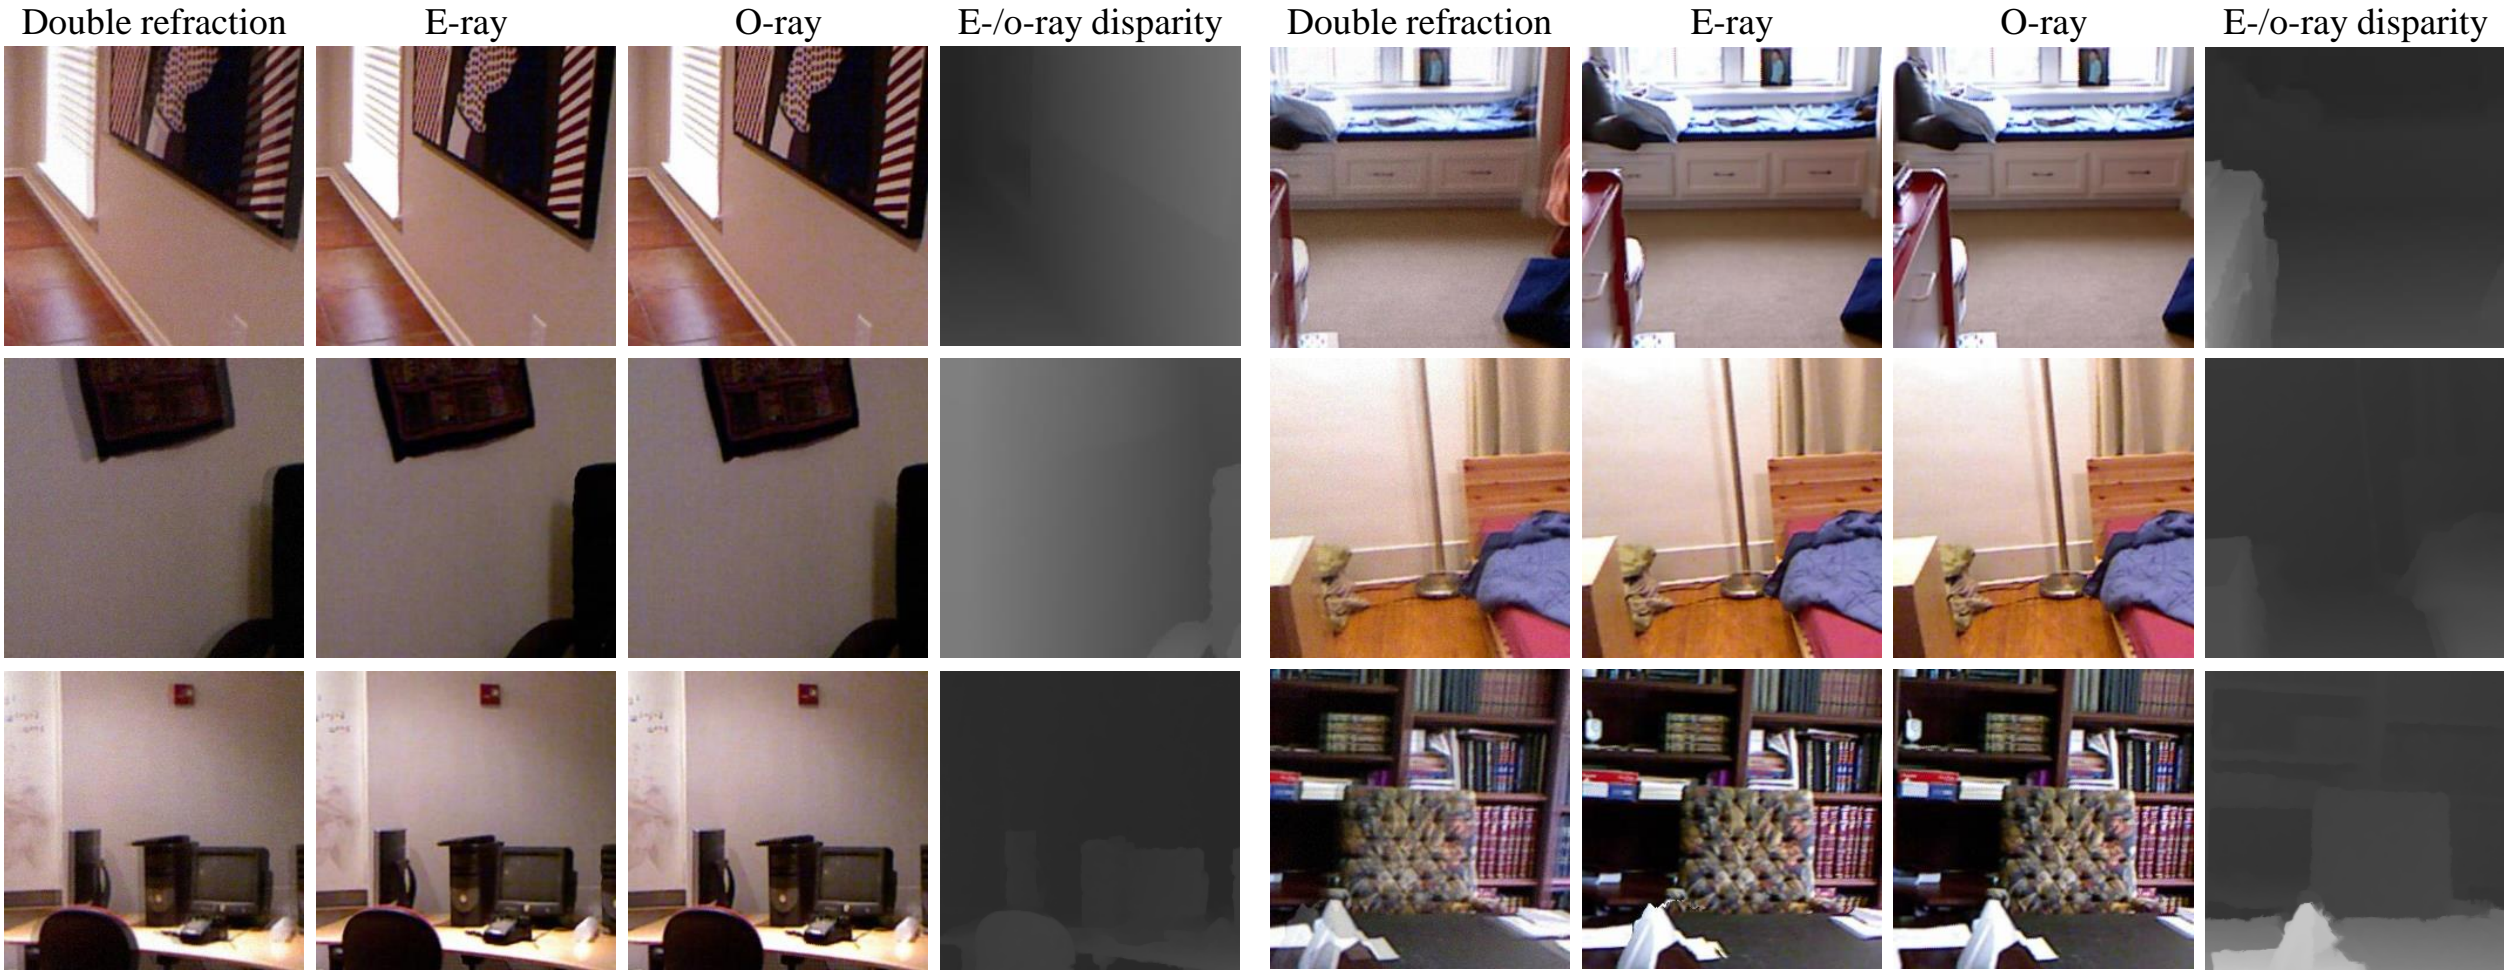

# Comparison of Stereo Image Restoration Results (Synthetic Test Dataset)

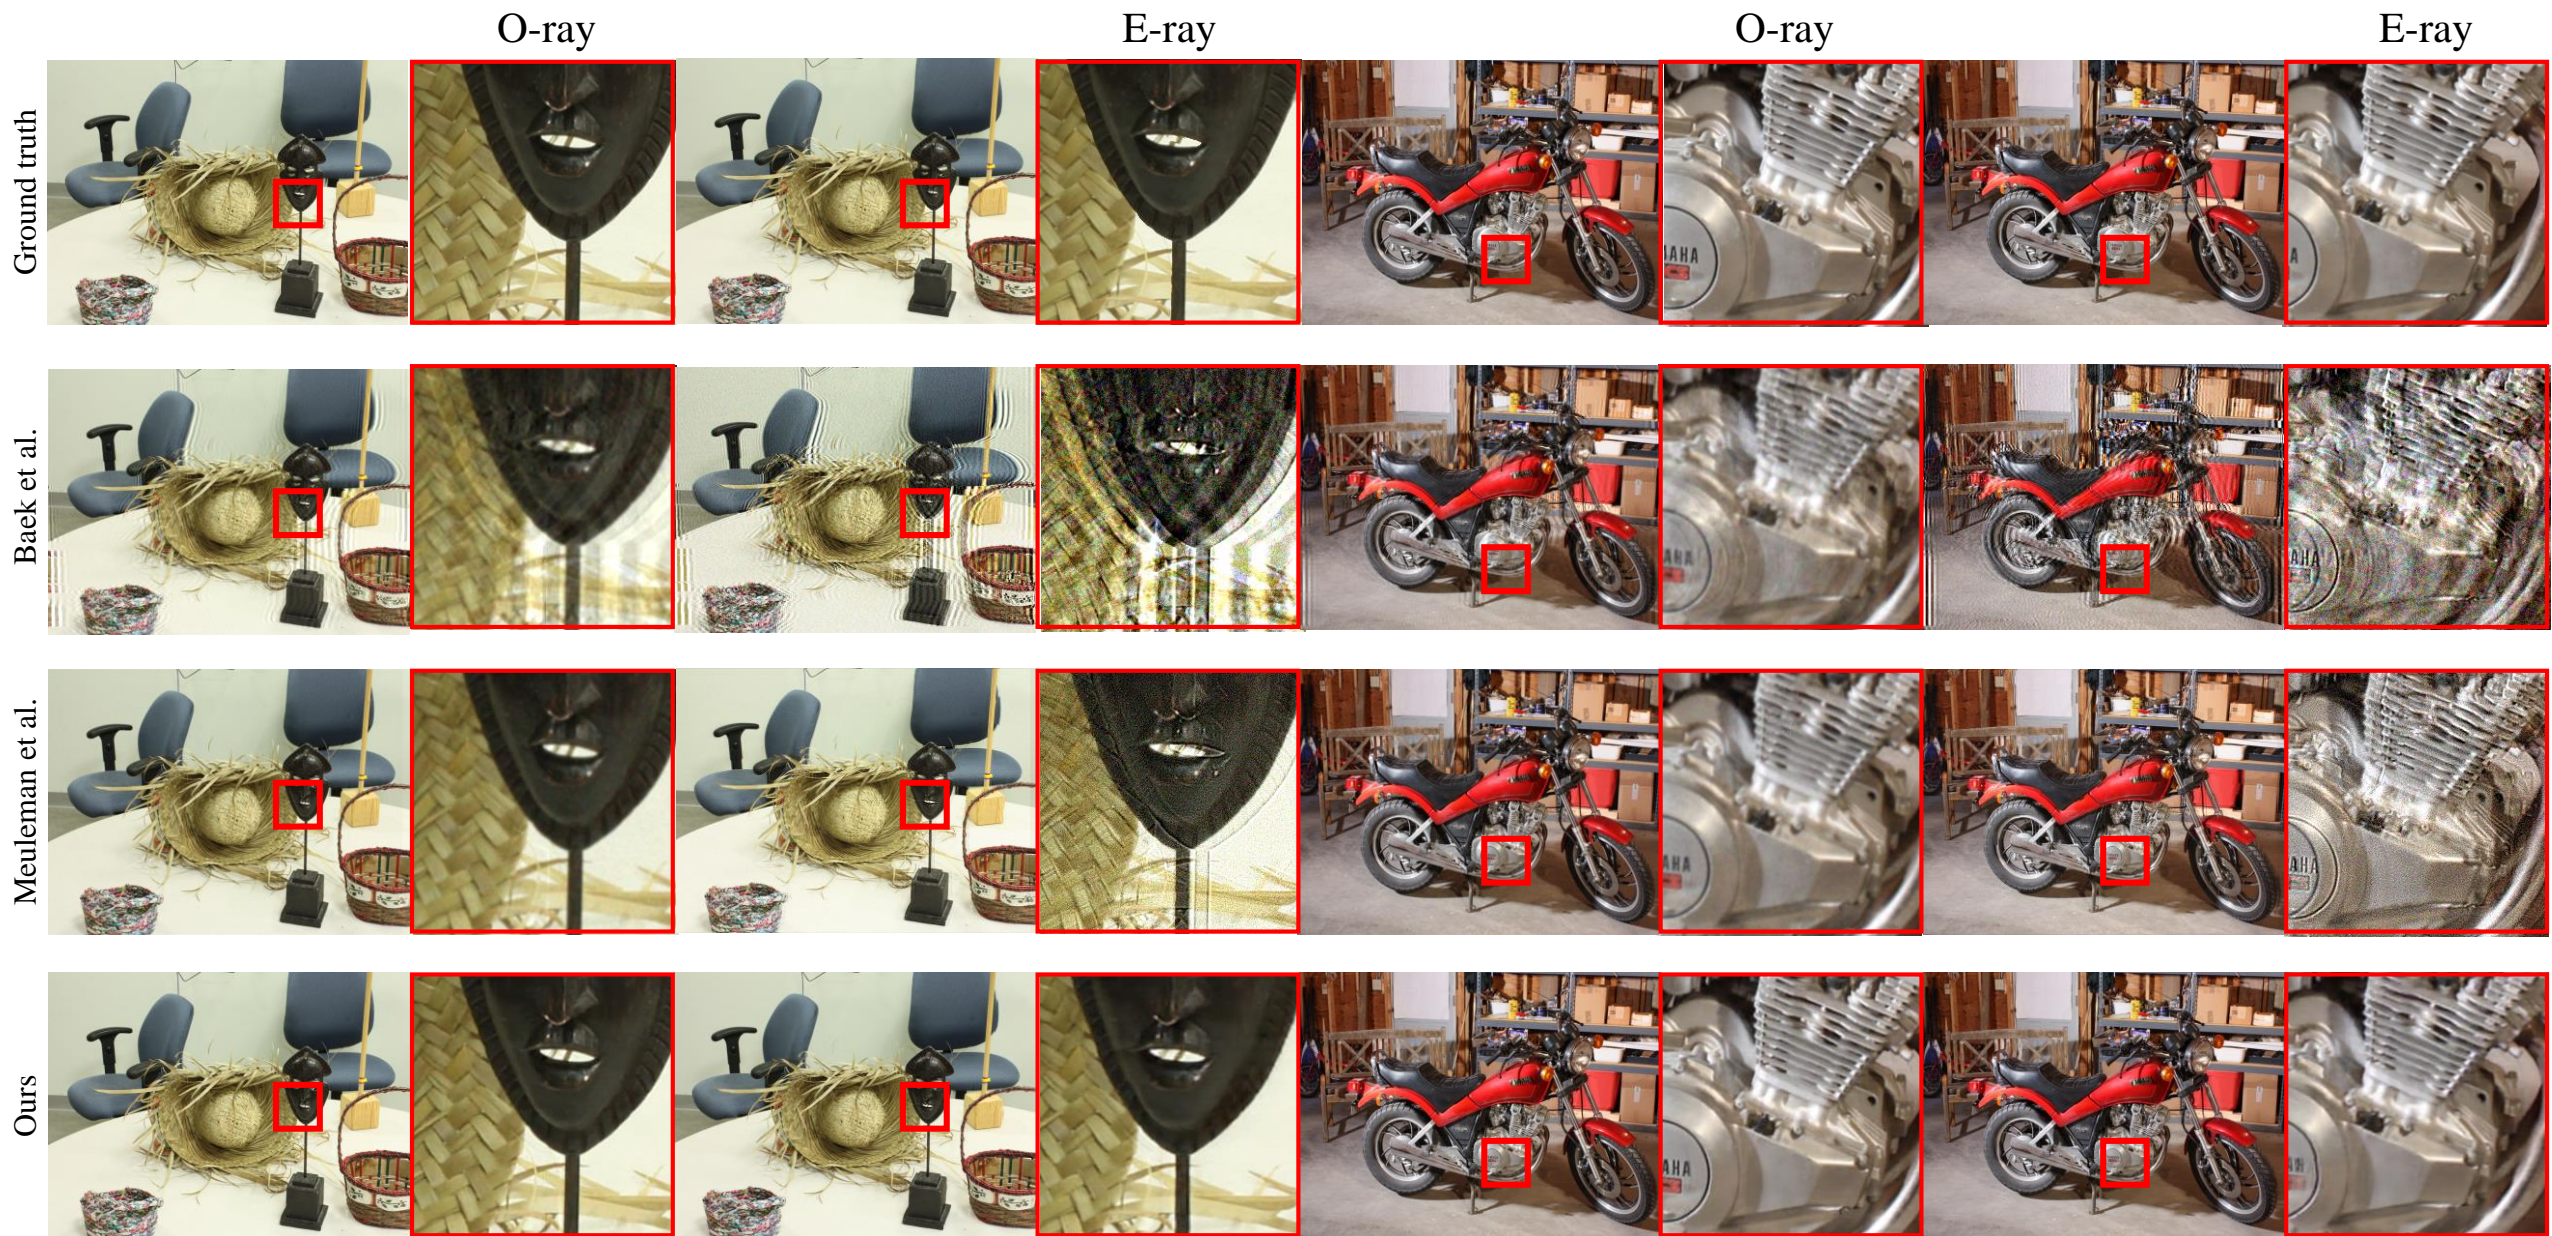

# Comparison of Stereo Image Restoration Results (Synthetic Test Dataset)

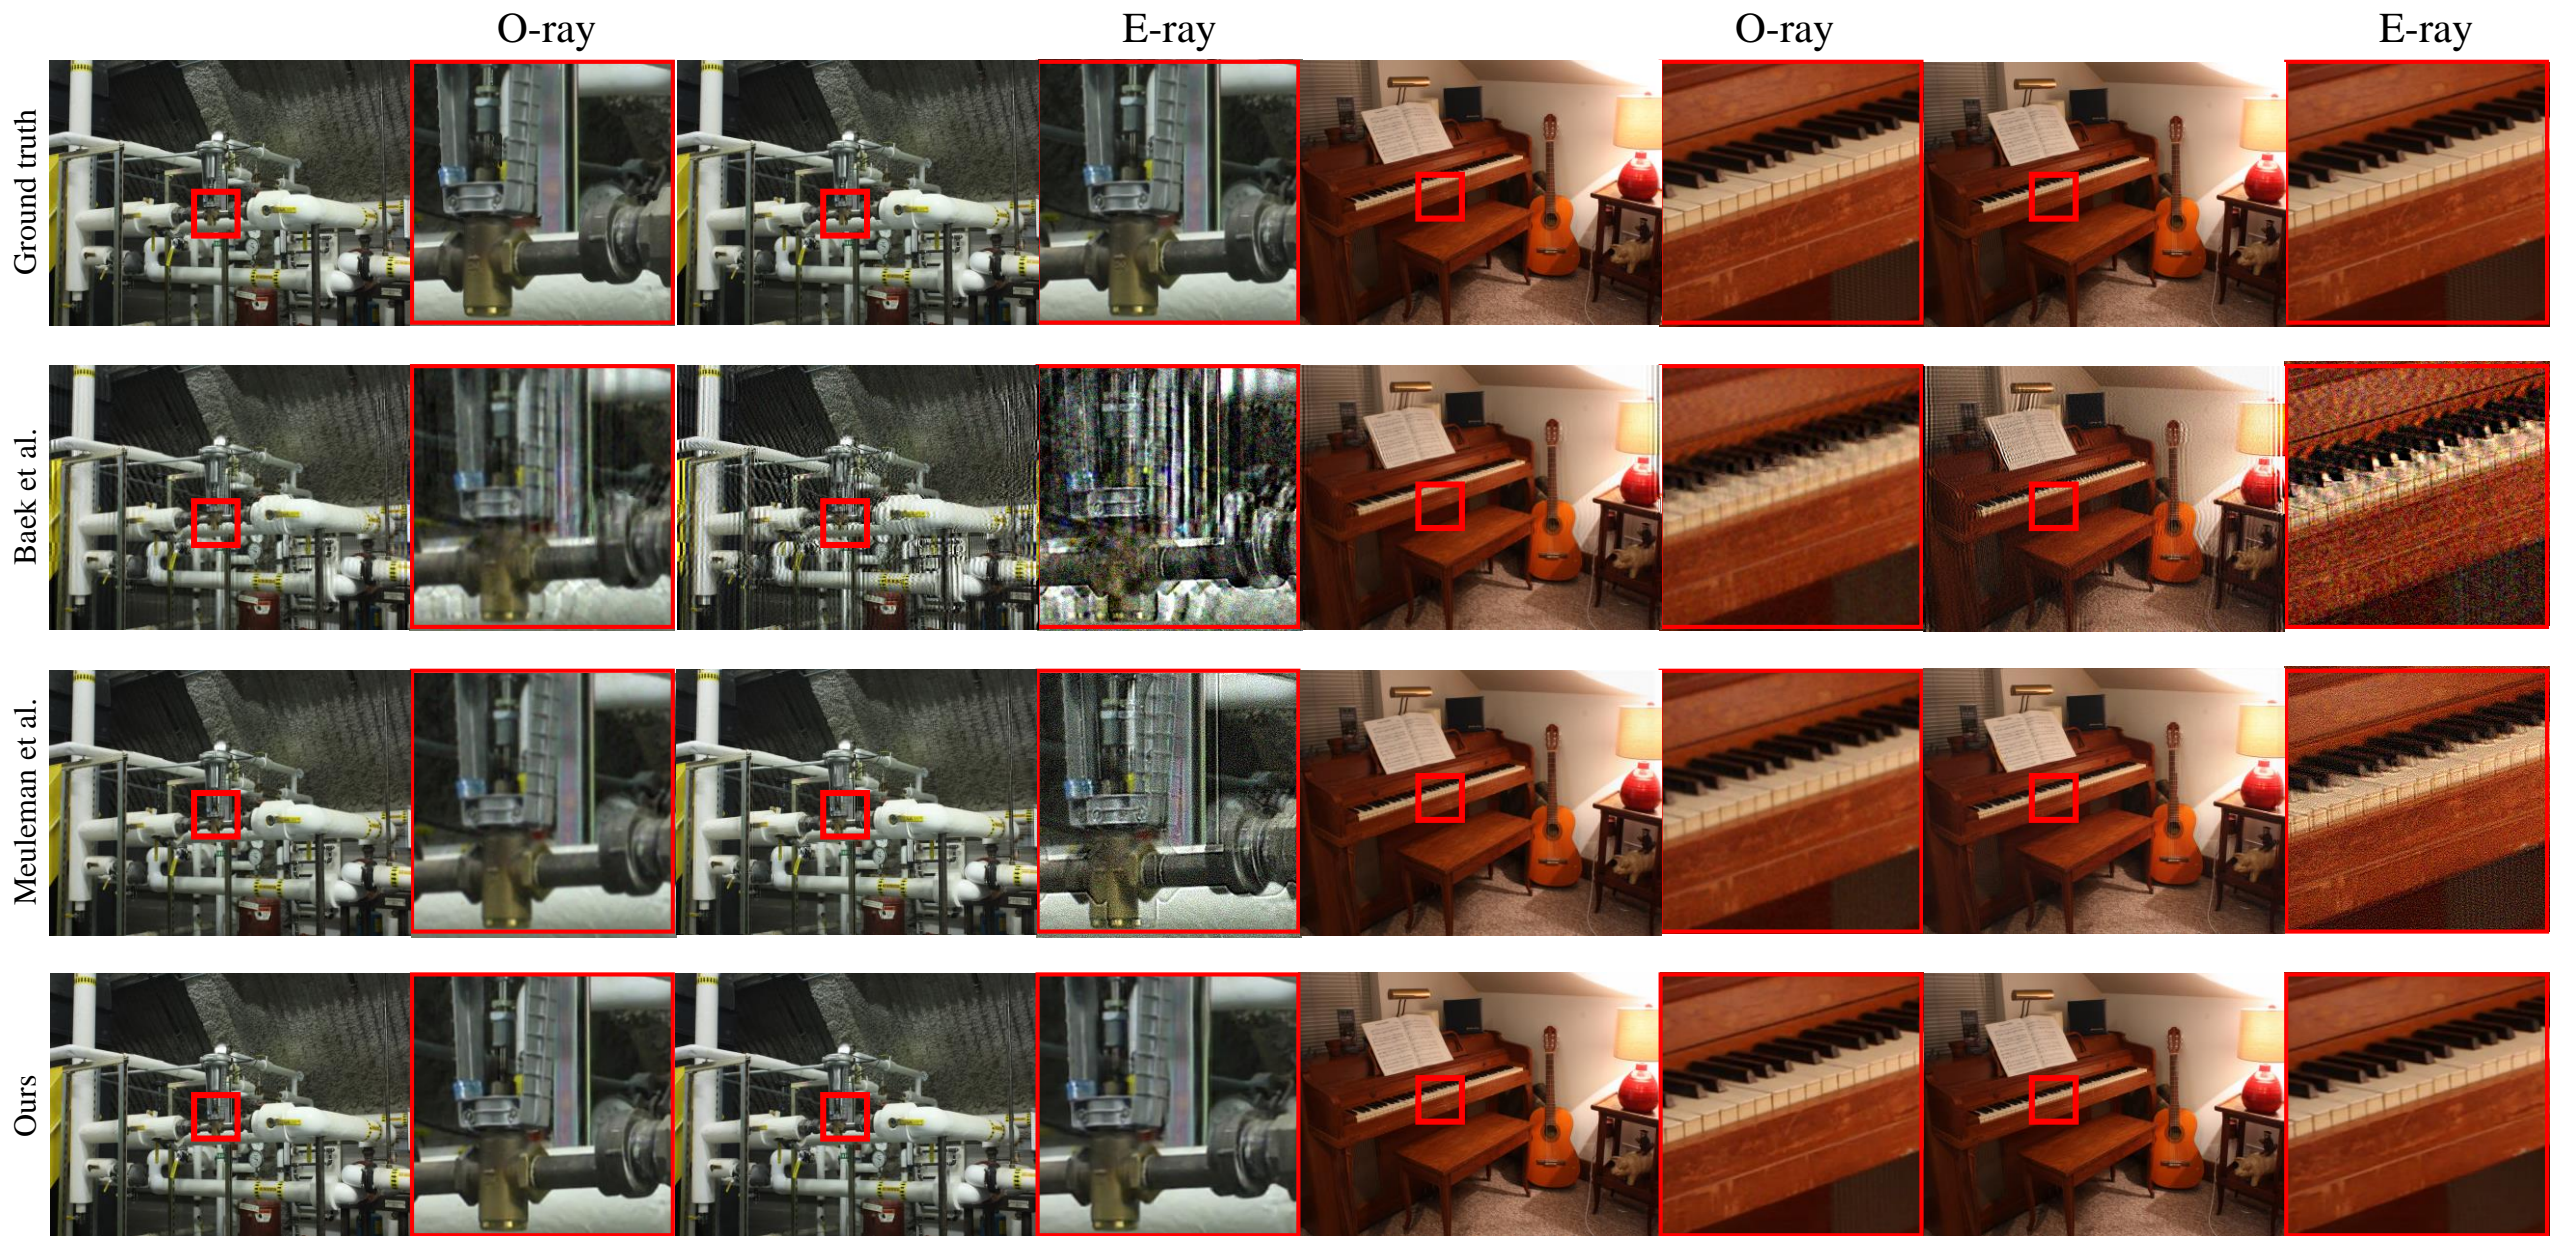

# Comparison of Stereo Image Restoration Results (Synthetic Test Dataset)

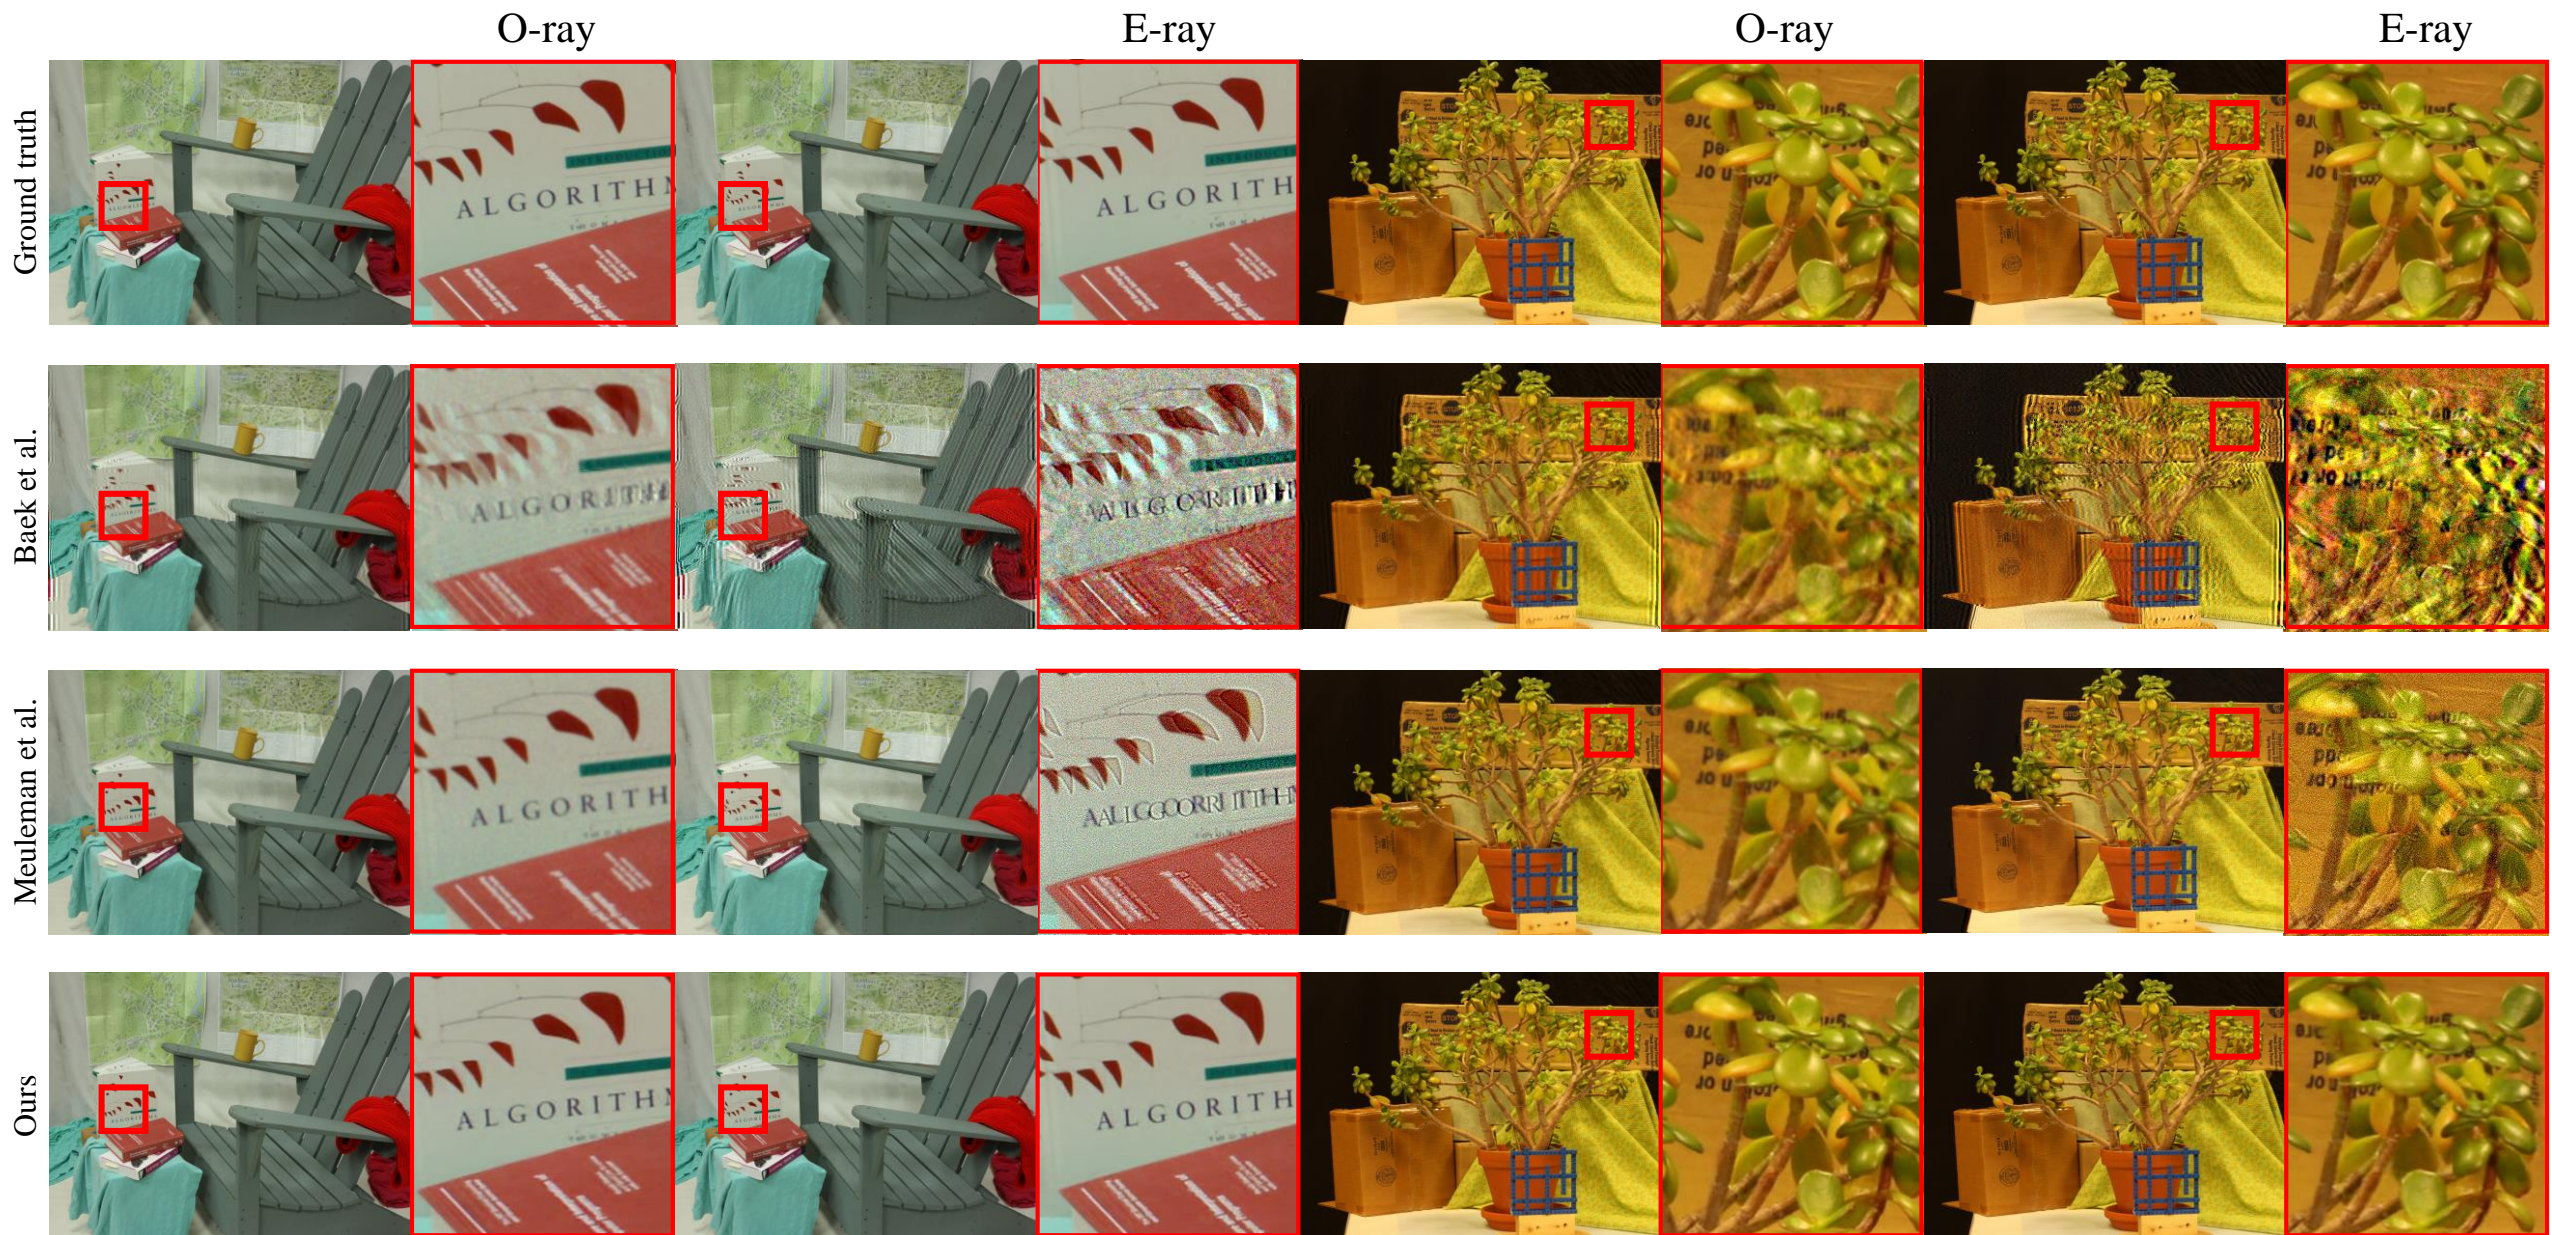

# Comparison of Stereo Image Restoration Results (Synthetic Test Dataset)

Ground truth

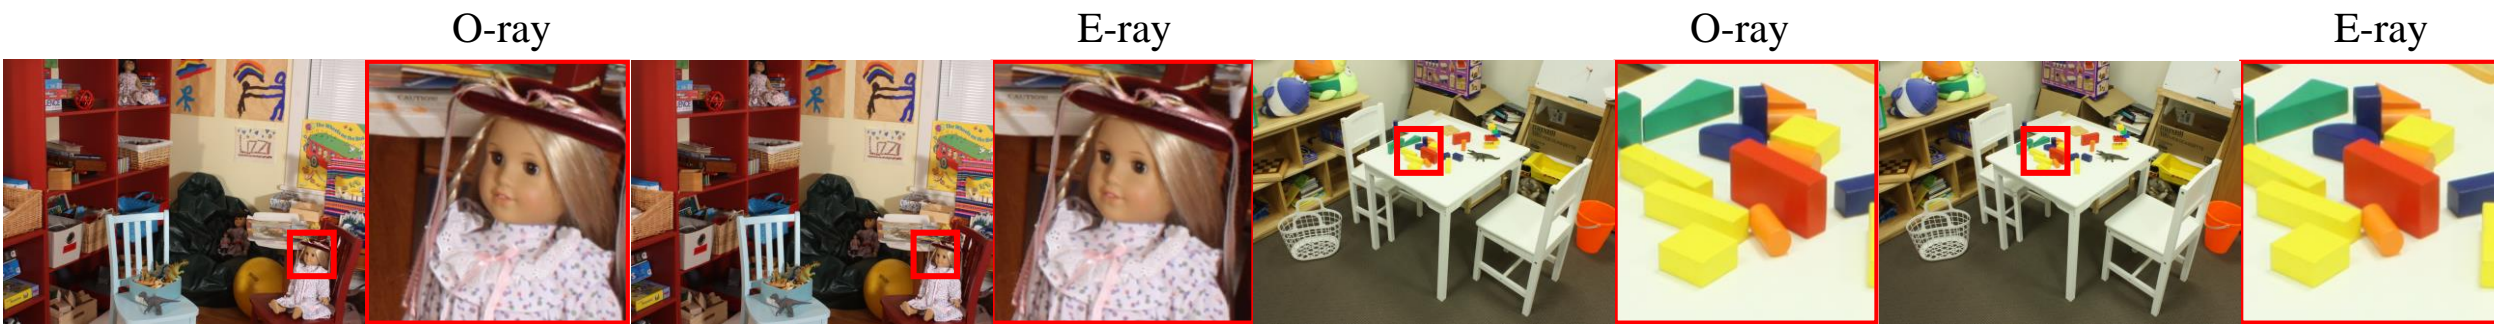

Baek et al.

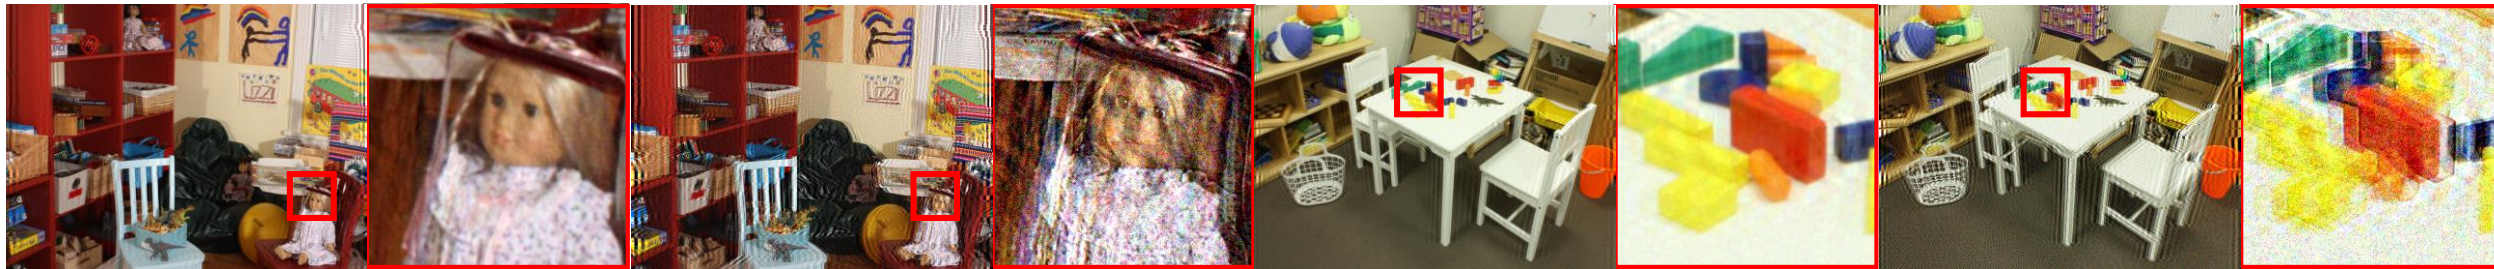

Meuleman et al.

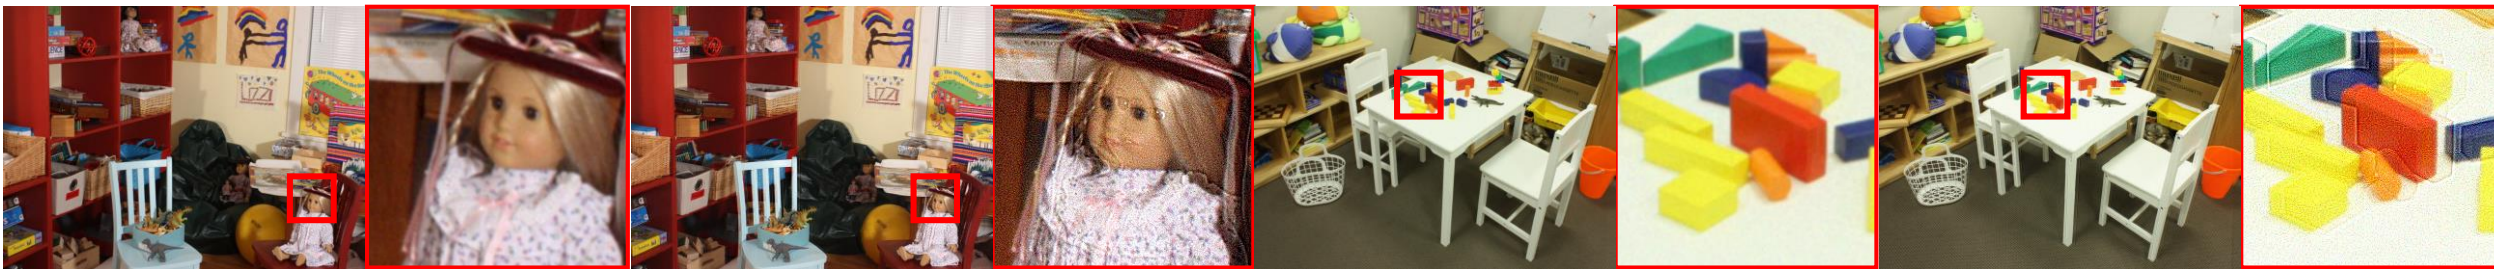

Ours

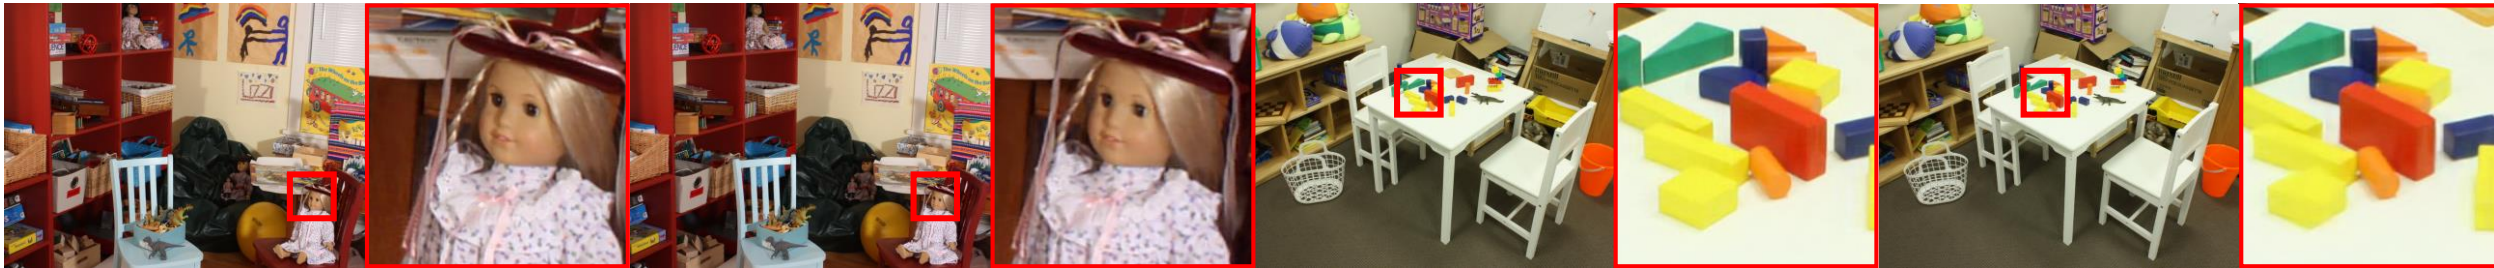

# Comparison of Stereo Image Restoration Results (Synthetic Test Dataset)

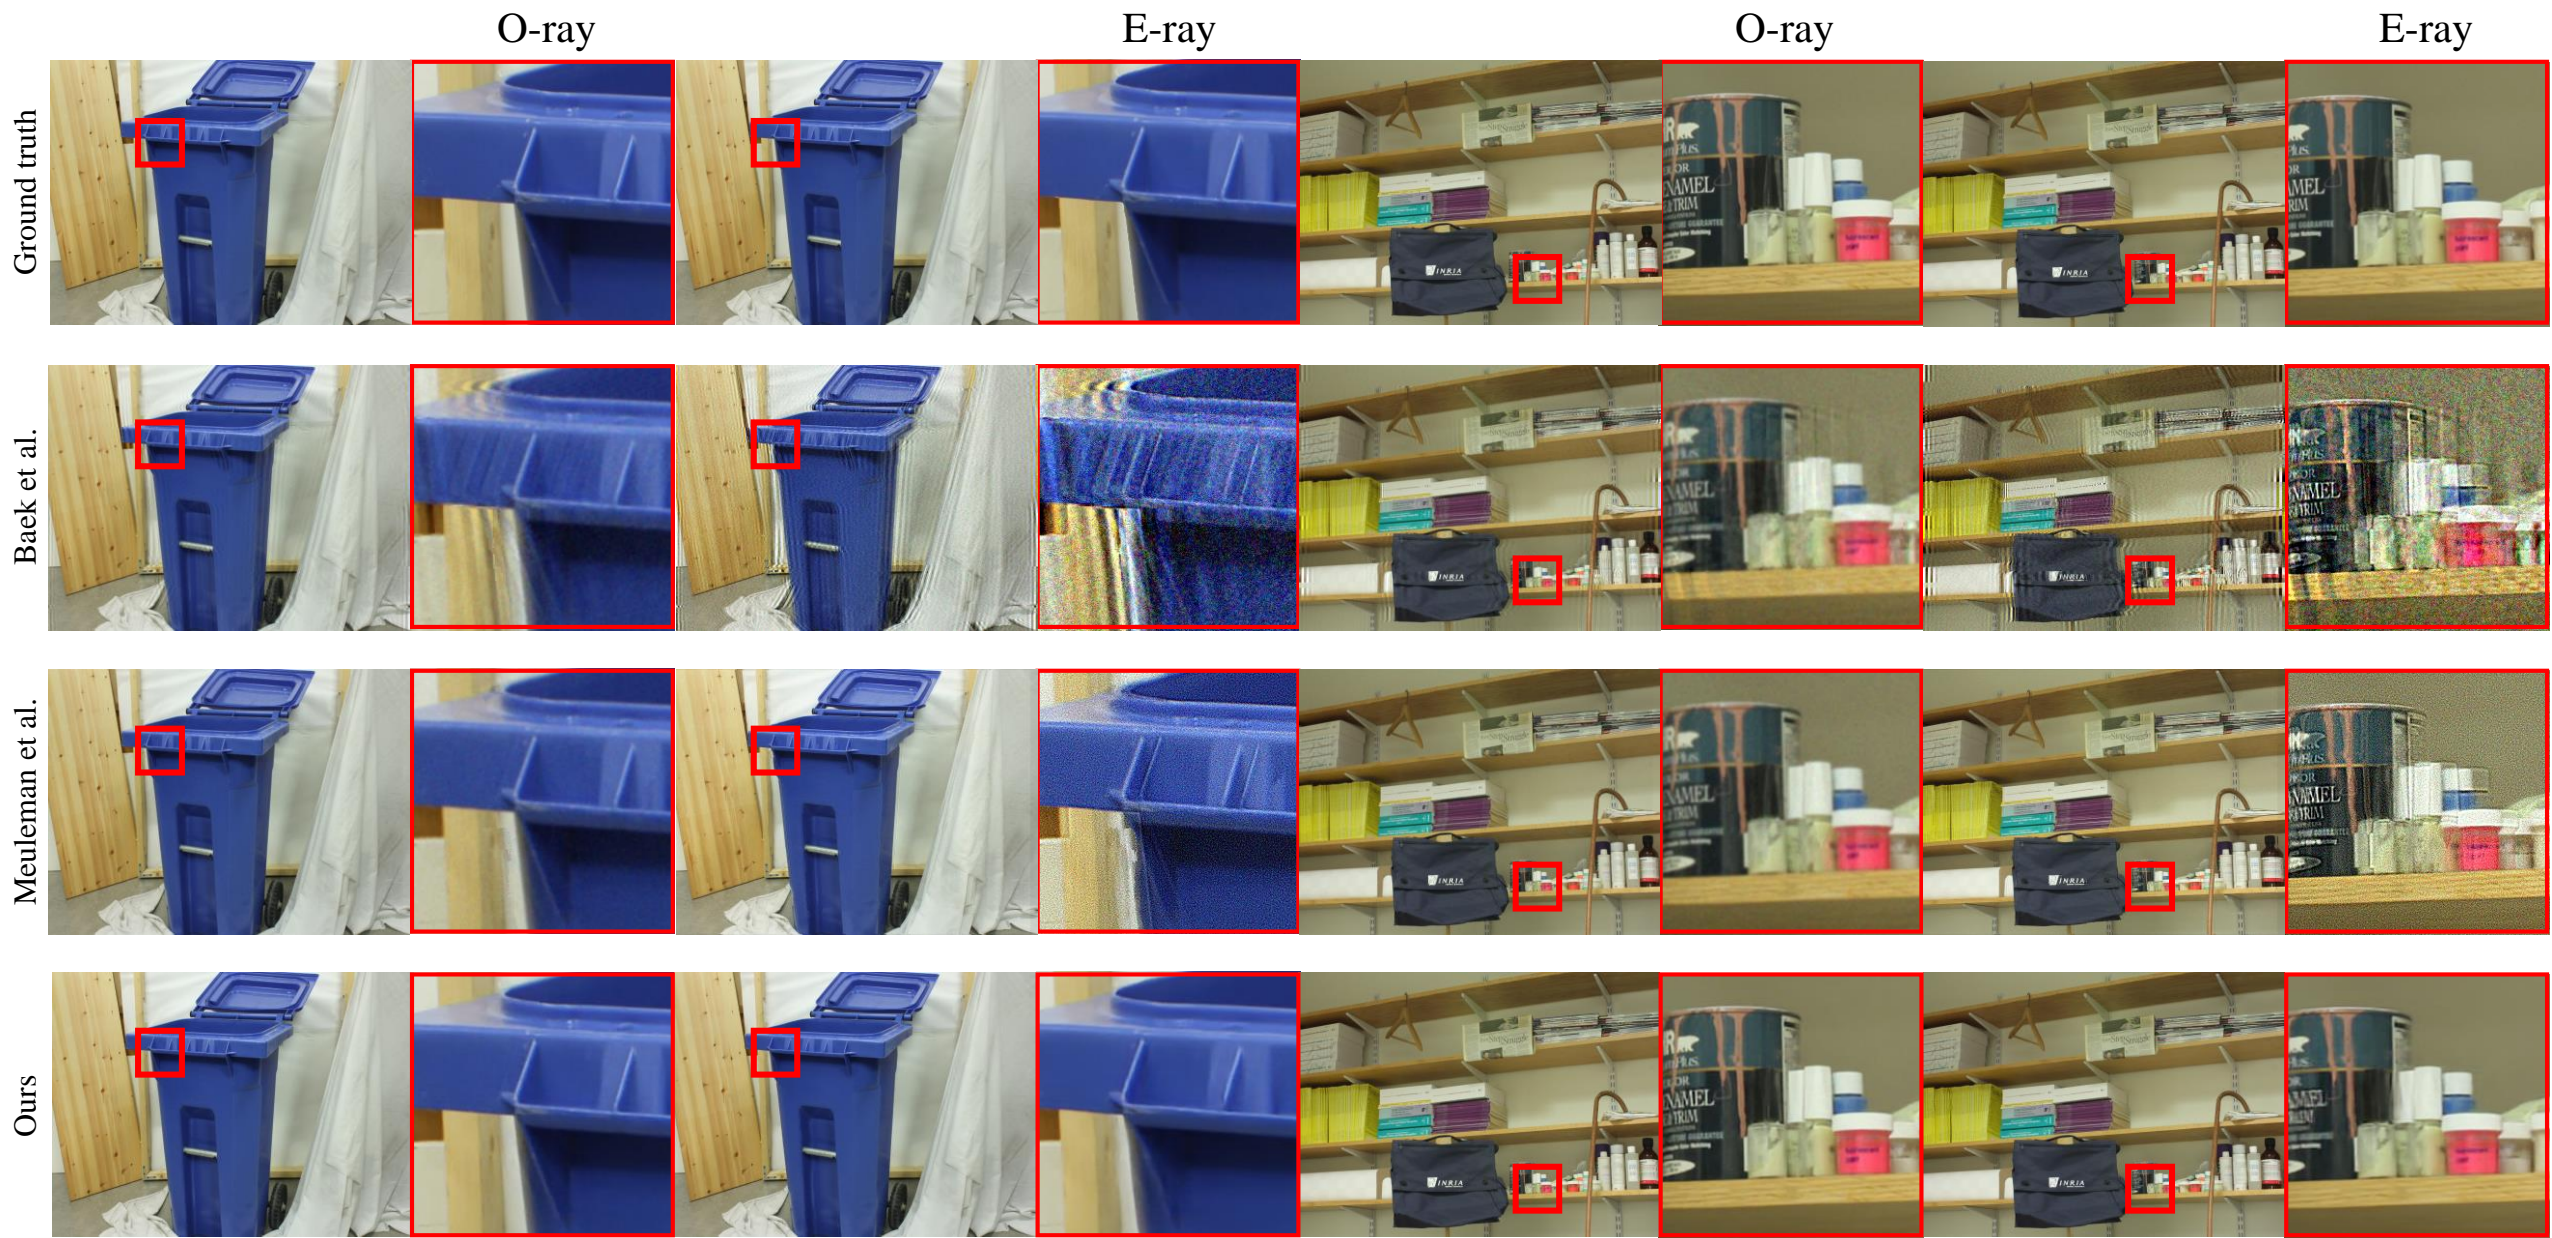

# Comparison of Stereo Image Restoration Results (Synthetic Test Dataset)

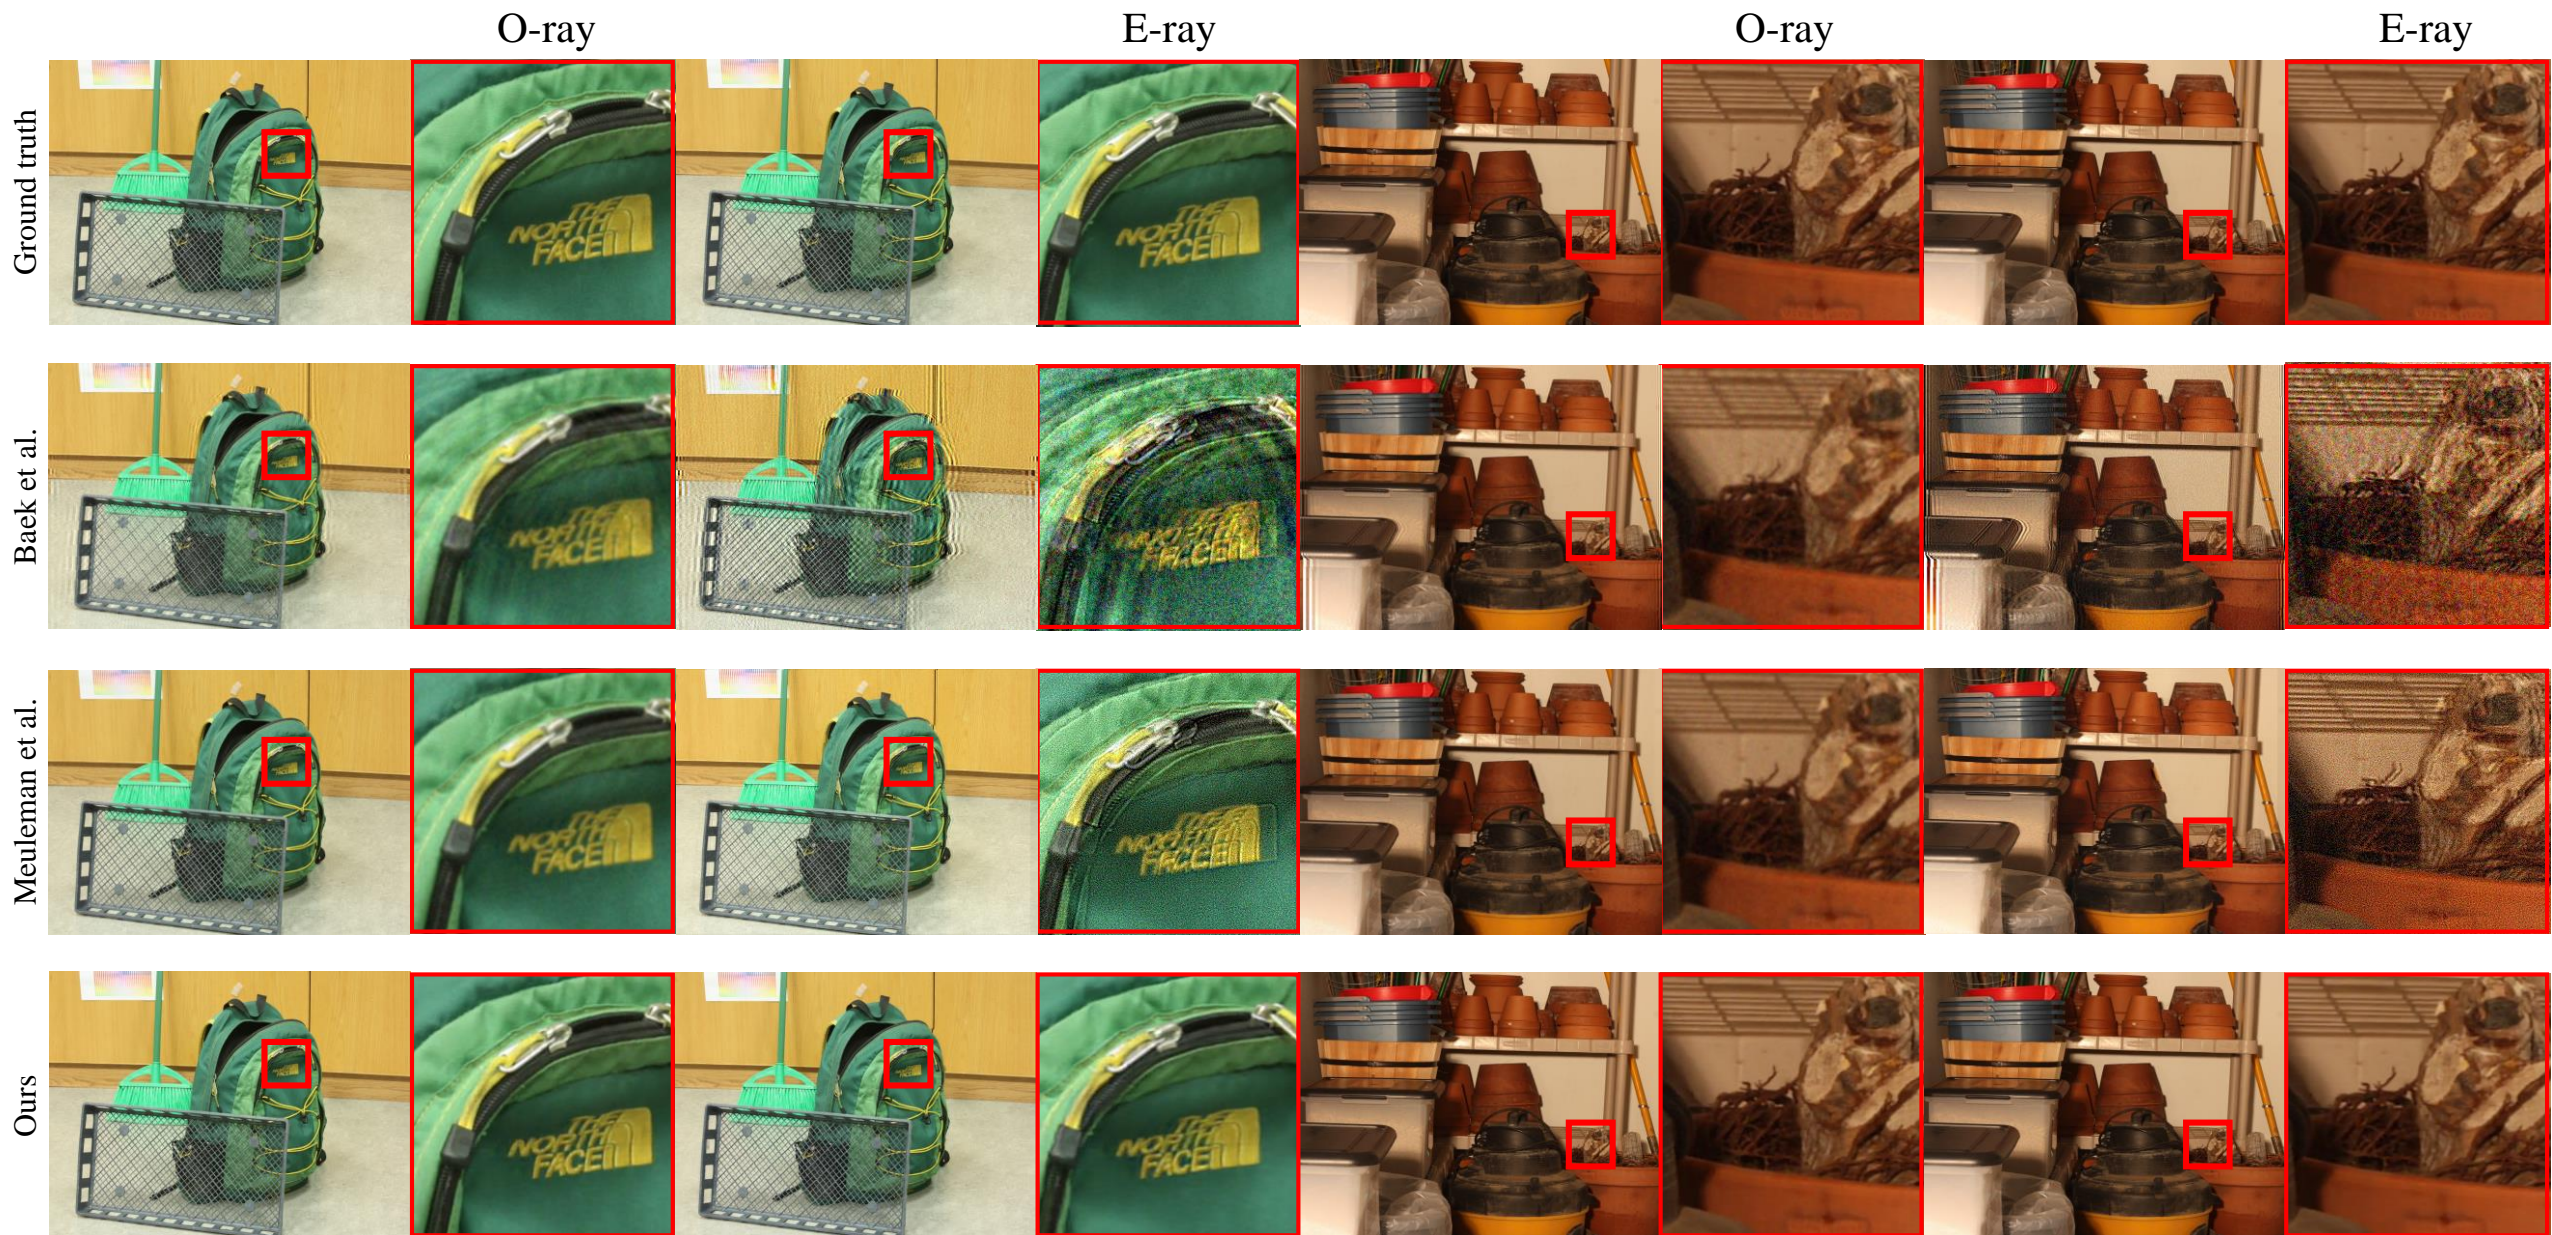

# Comparison of Stereo Image Restoration Results (Synthetic Test Dataset)

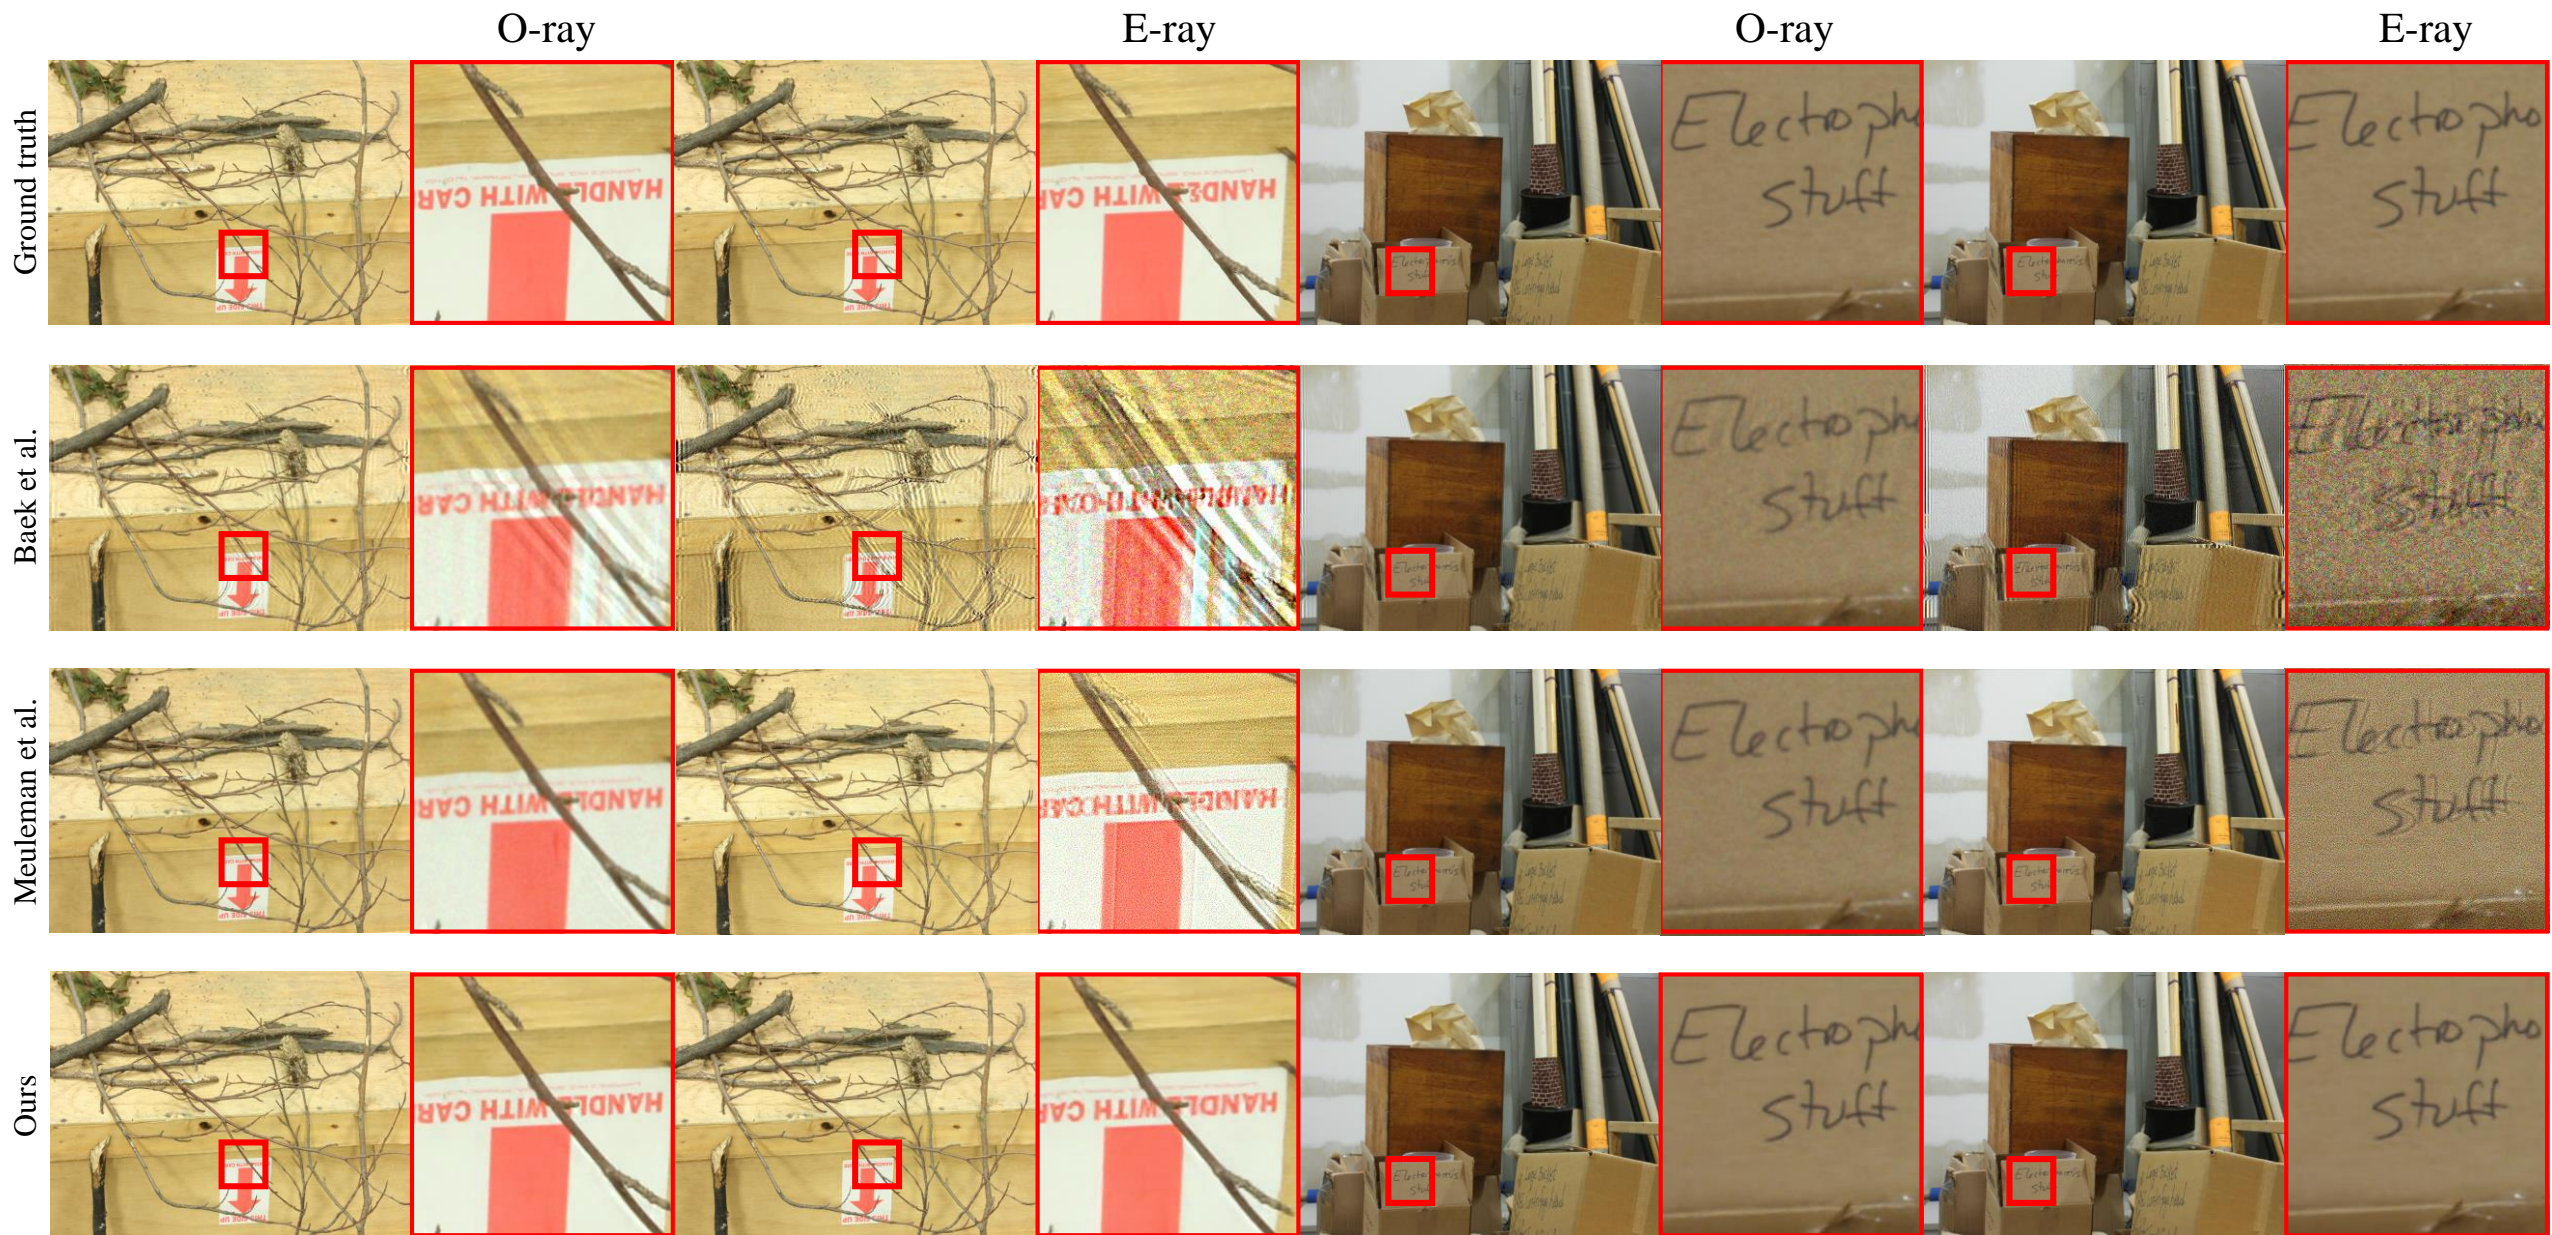

# Comparison of Stereo Image Restoration Results (Synthetic Test Dataset)

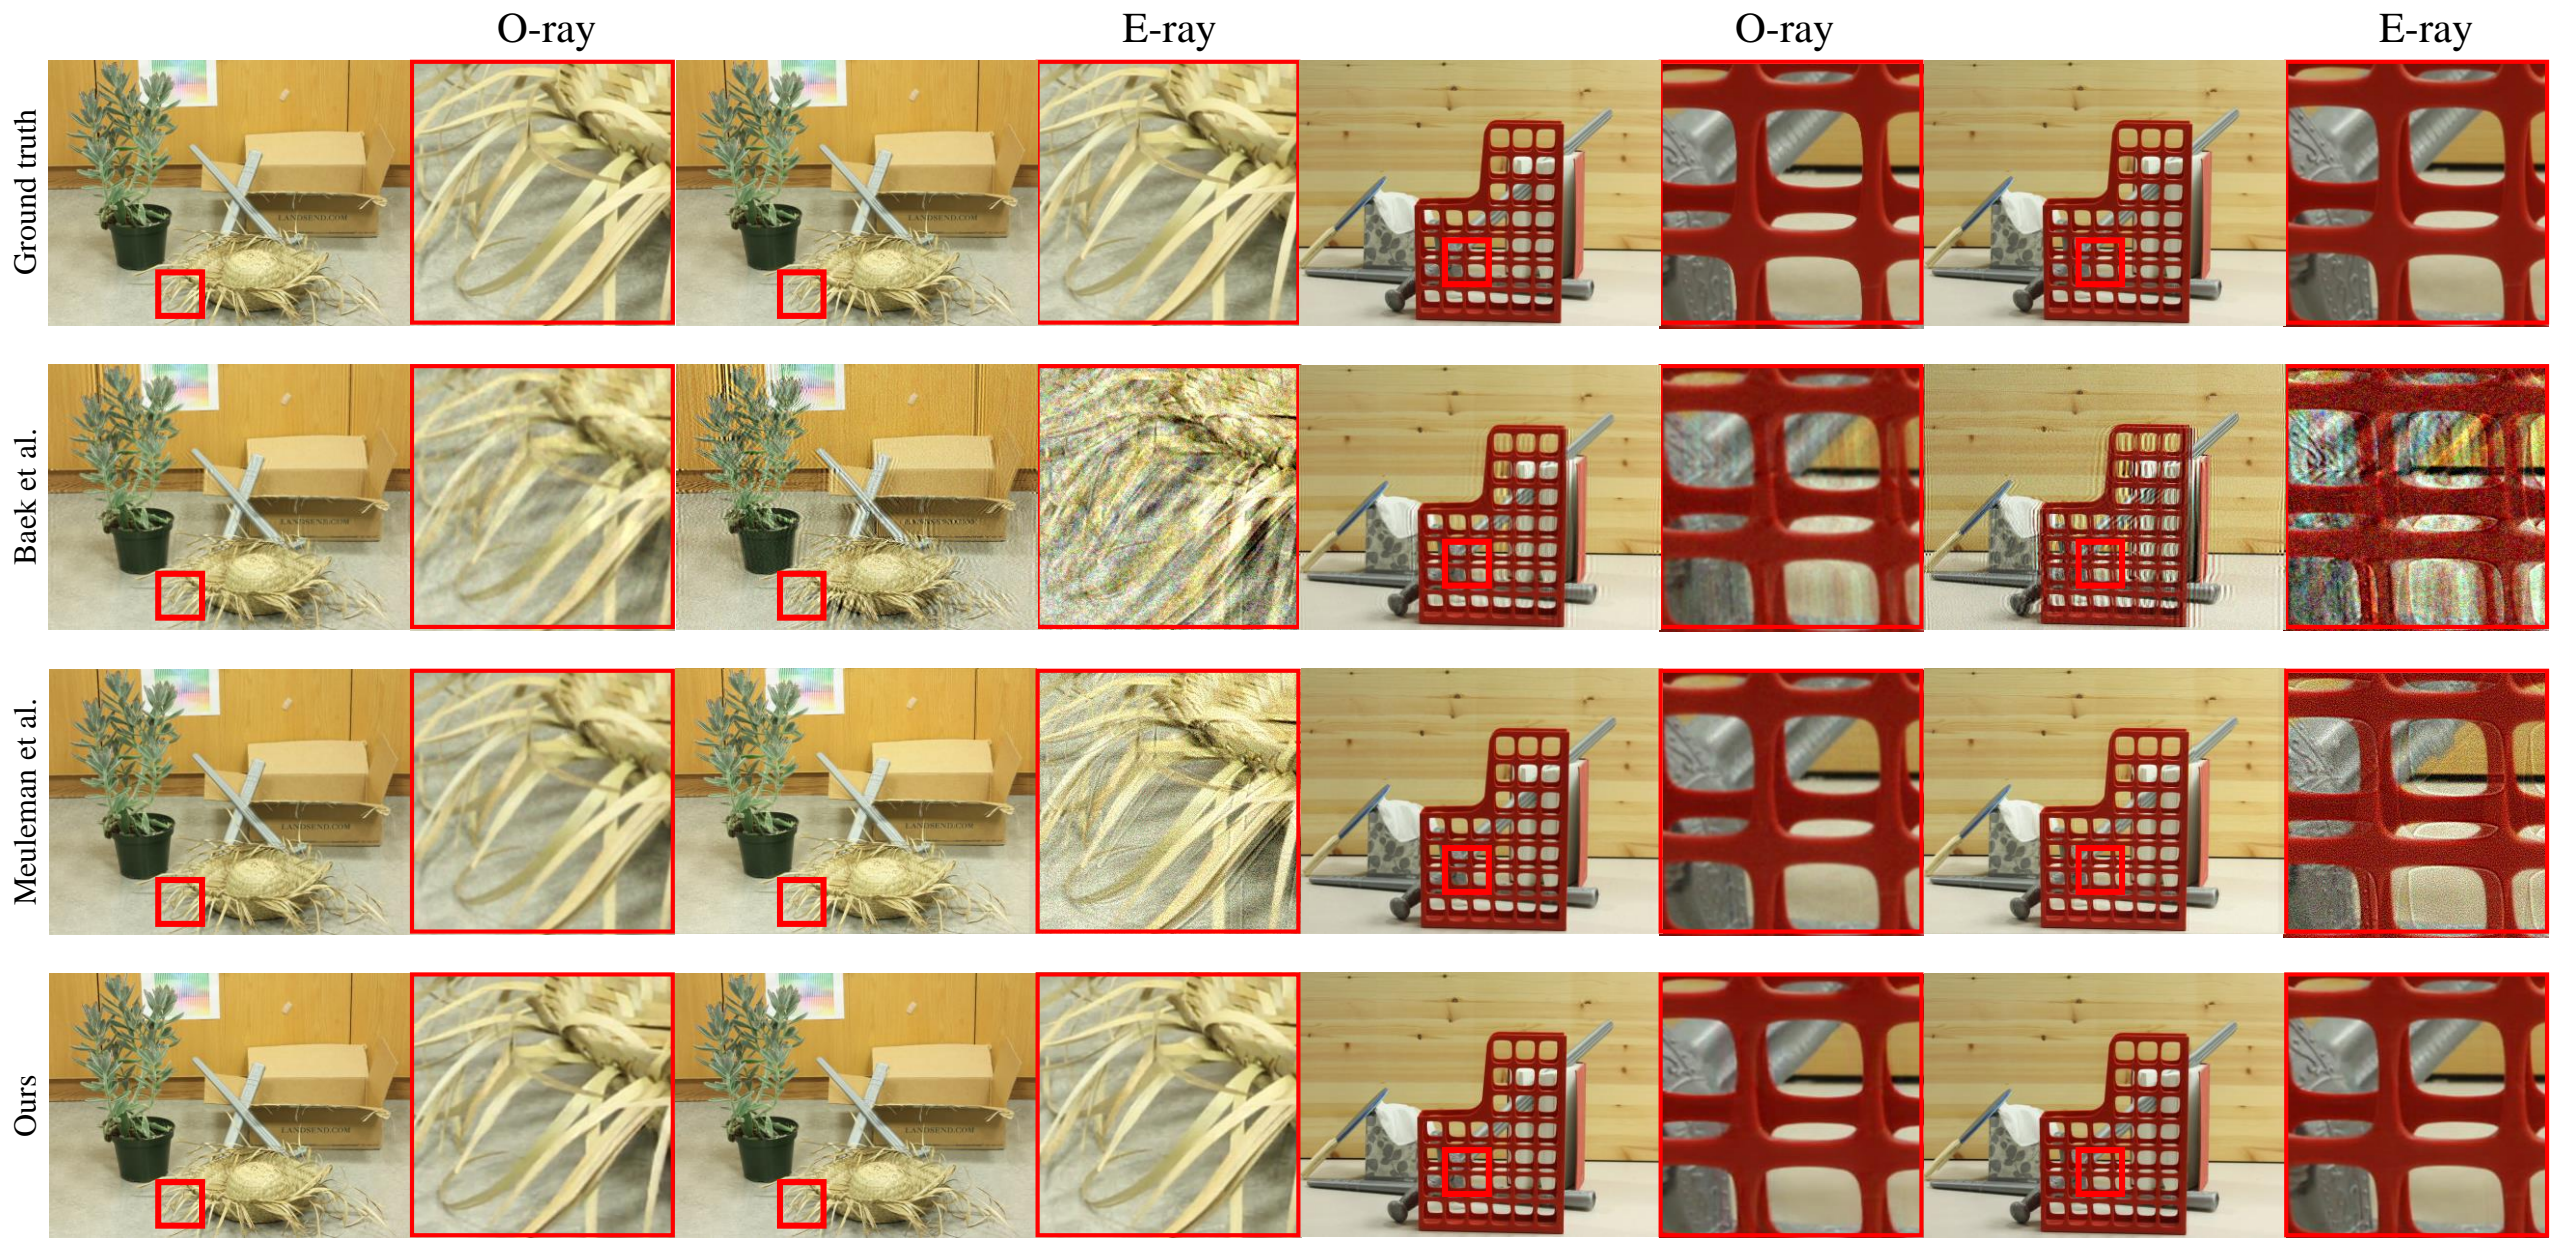

# Comparison of Stereo Image Restoration Results (Synthetic Test Dataset)

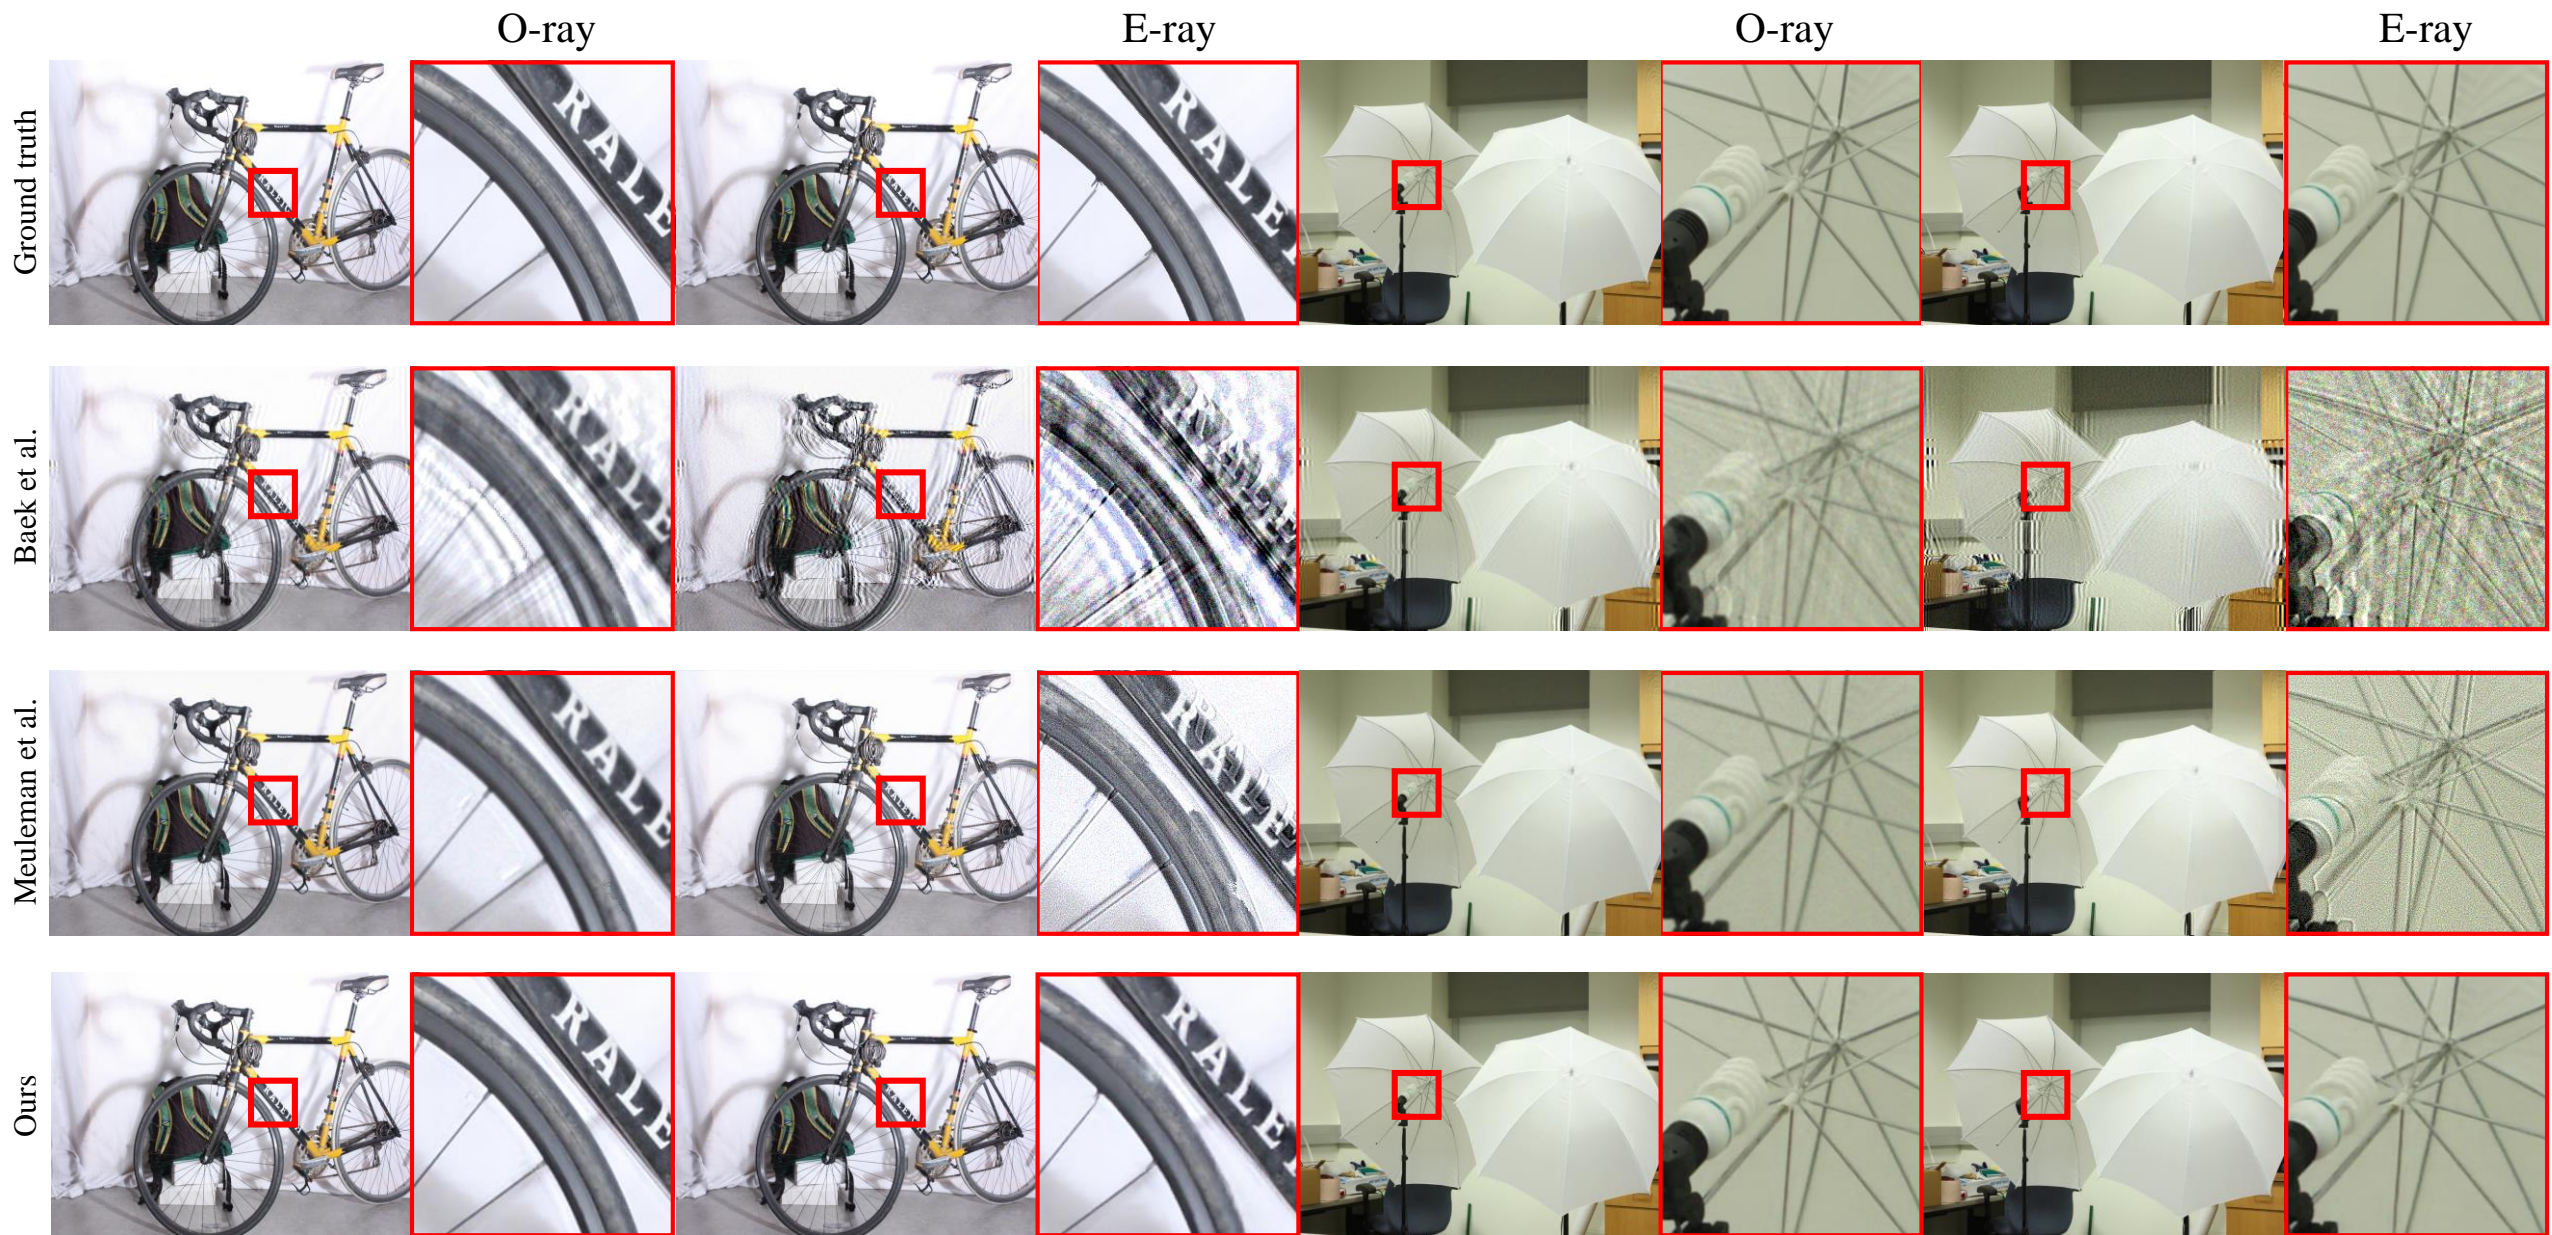

# Comparison of Stereo Image Restoration Results (Synthetic Test Dataset)

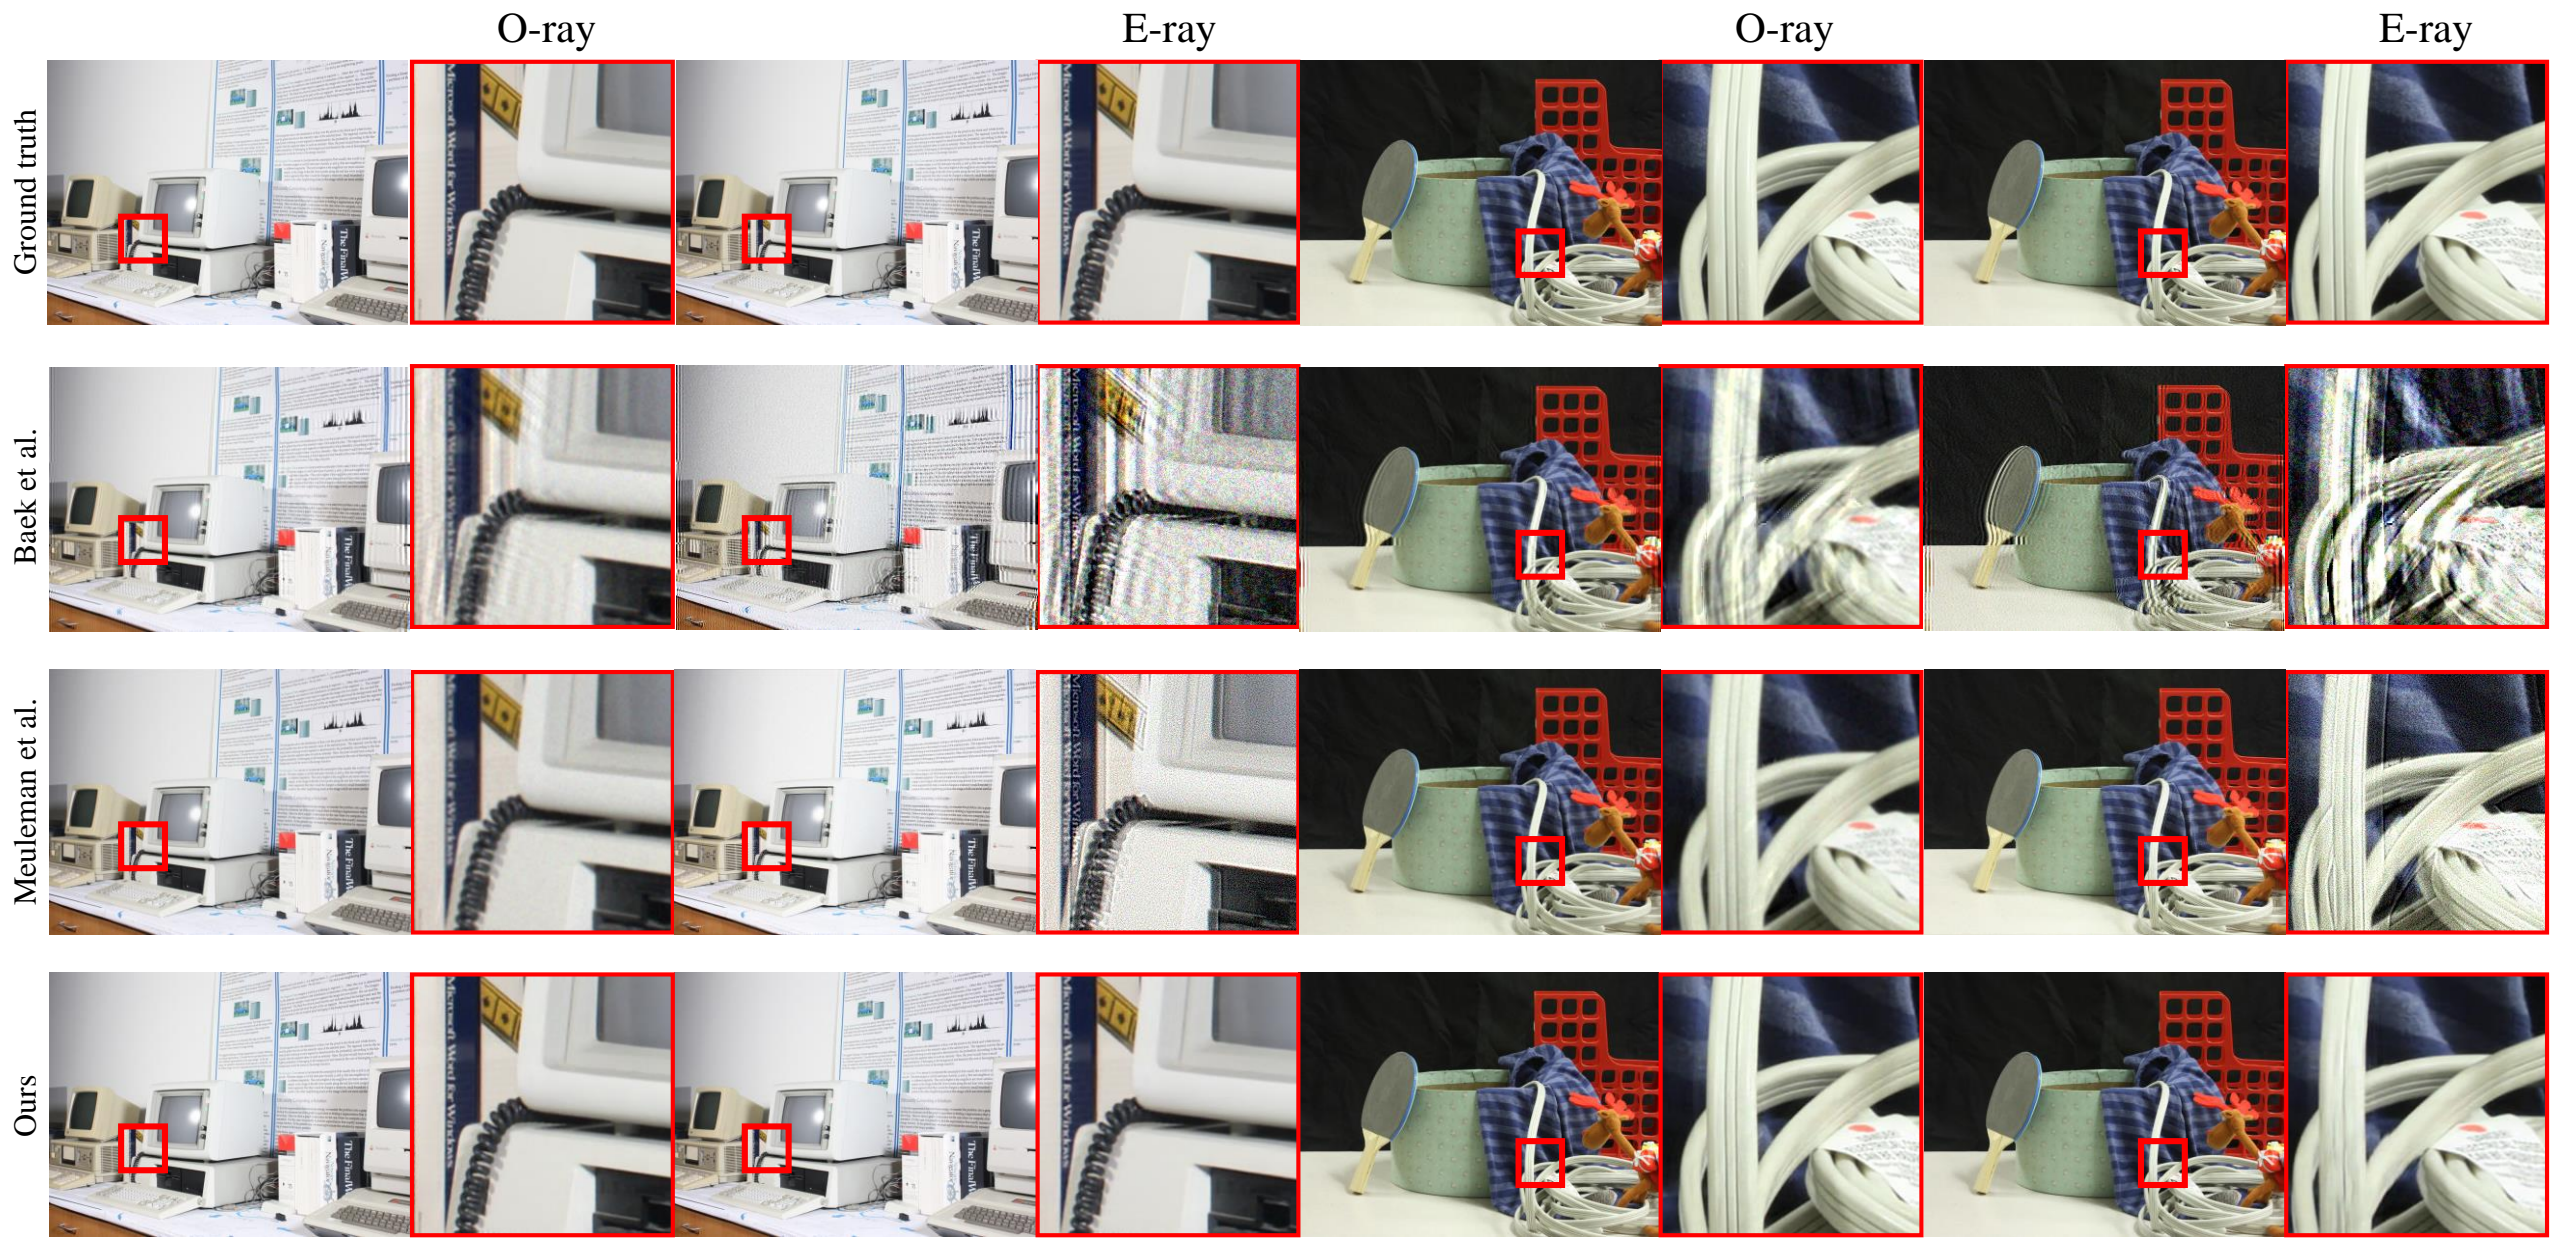

# Comparison of Stereo Image Restoration Results (Synthetic Test Dataset)

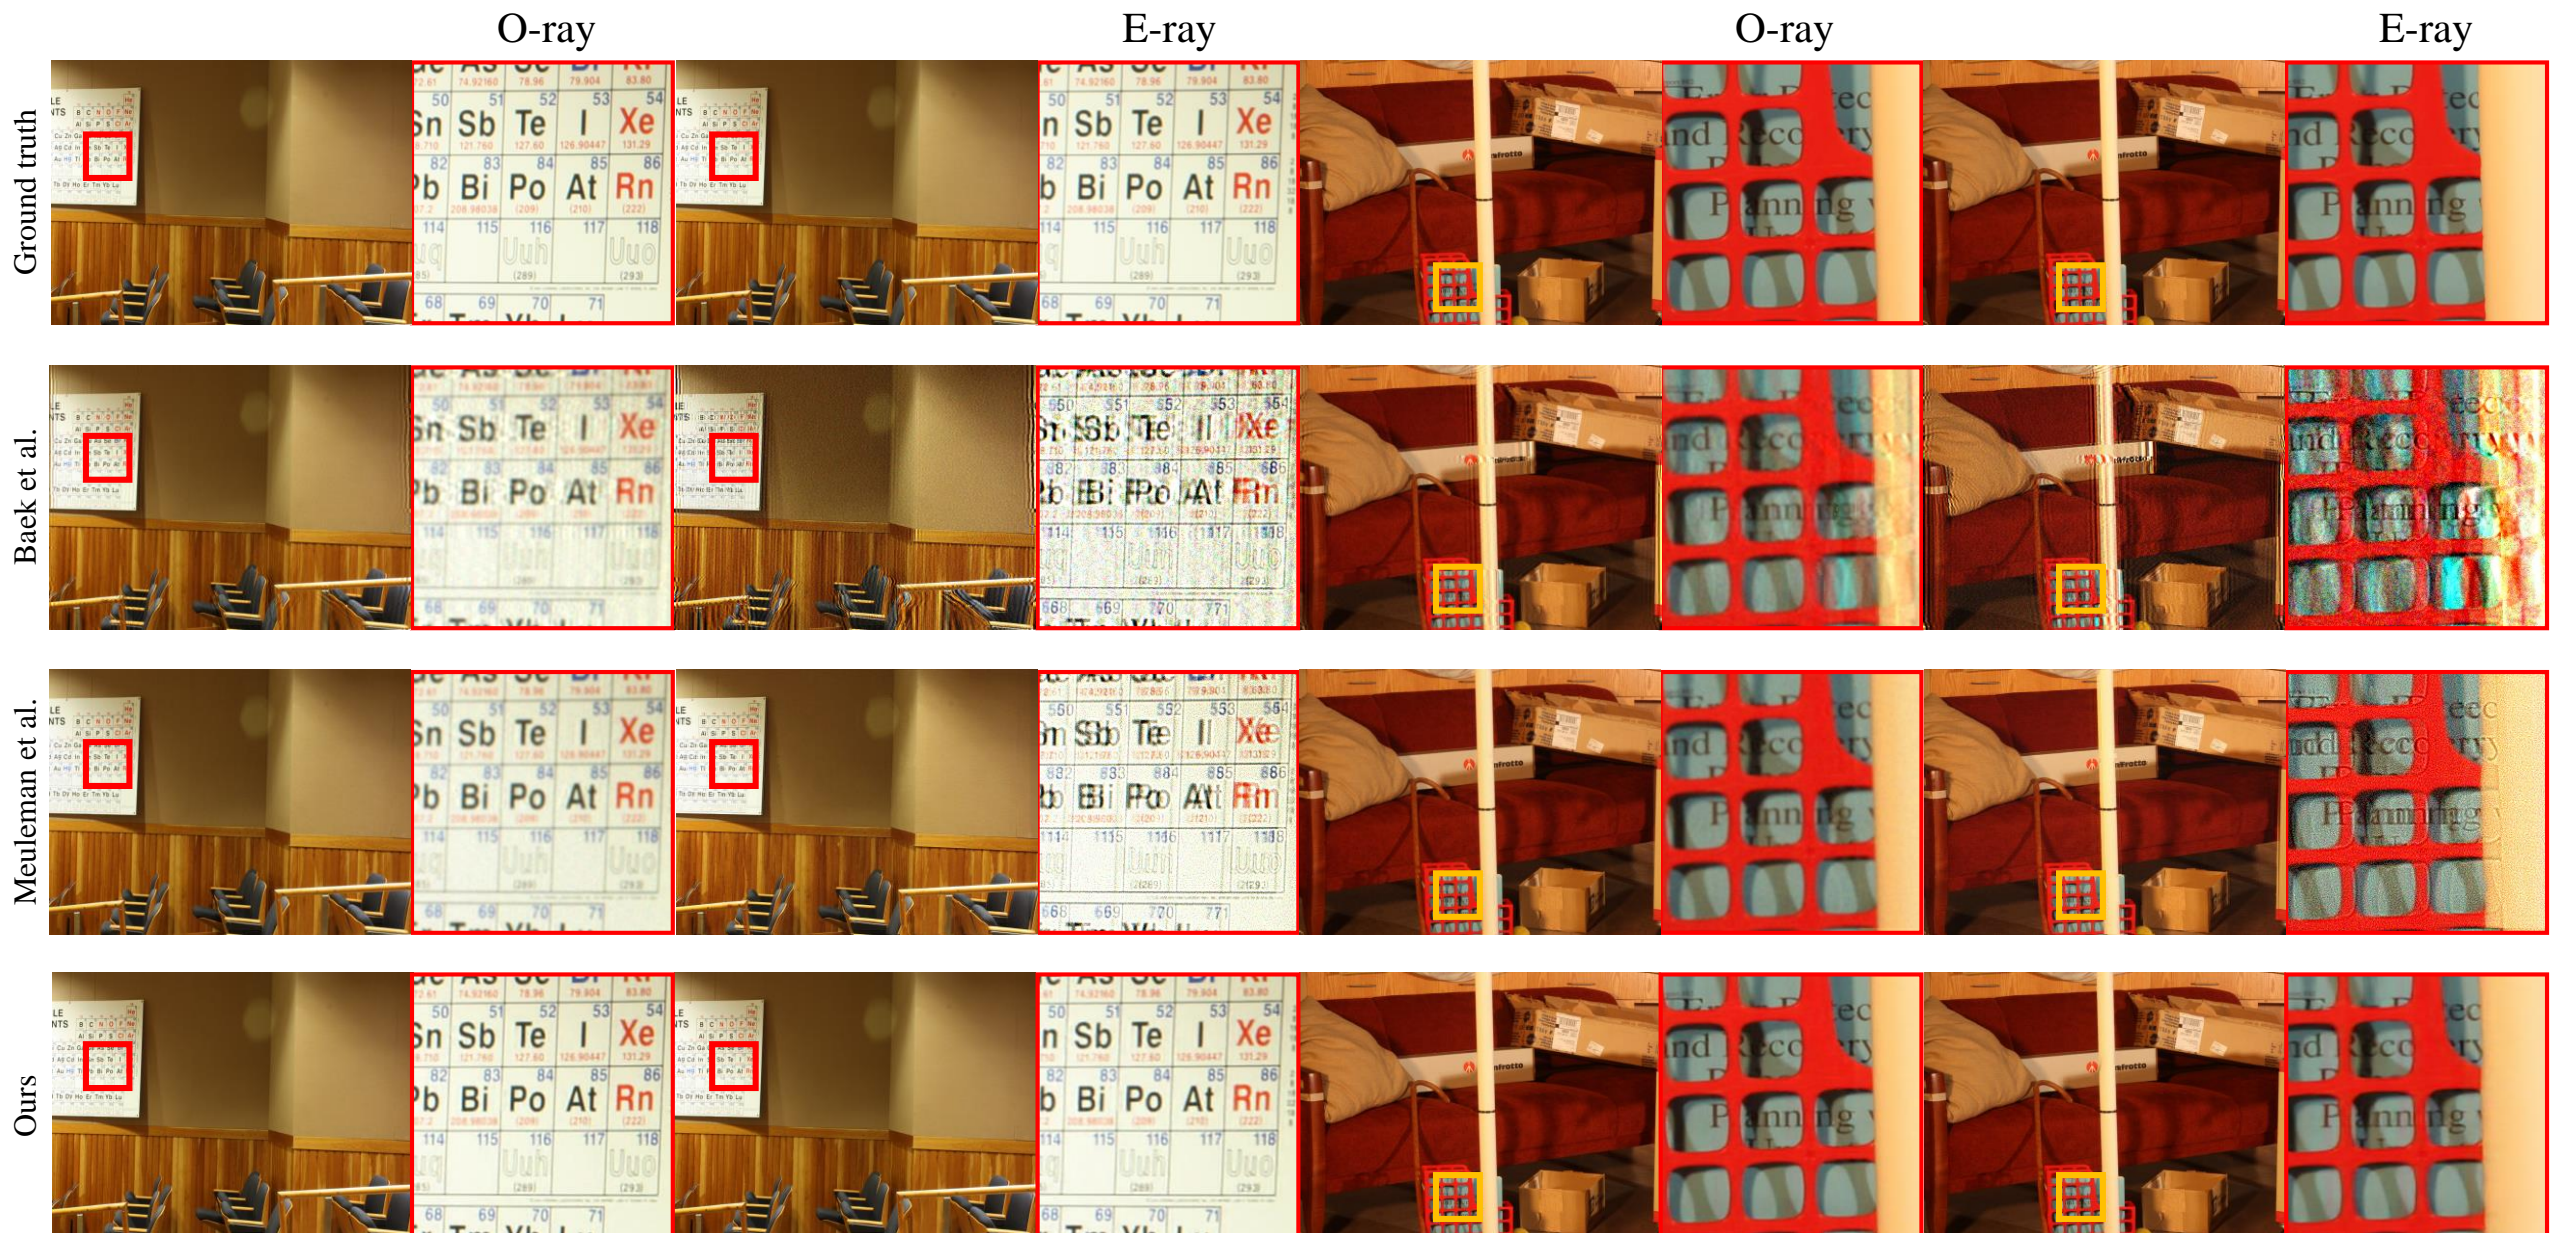

# Comparison of Stereo Image Restoration Results (Synthetic Test Dataset)

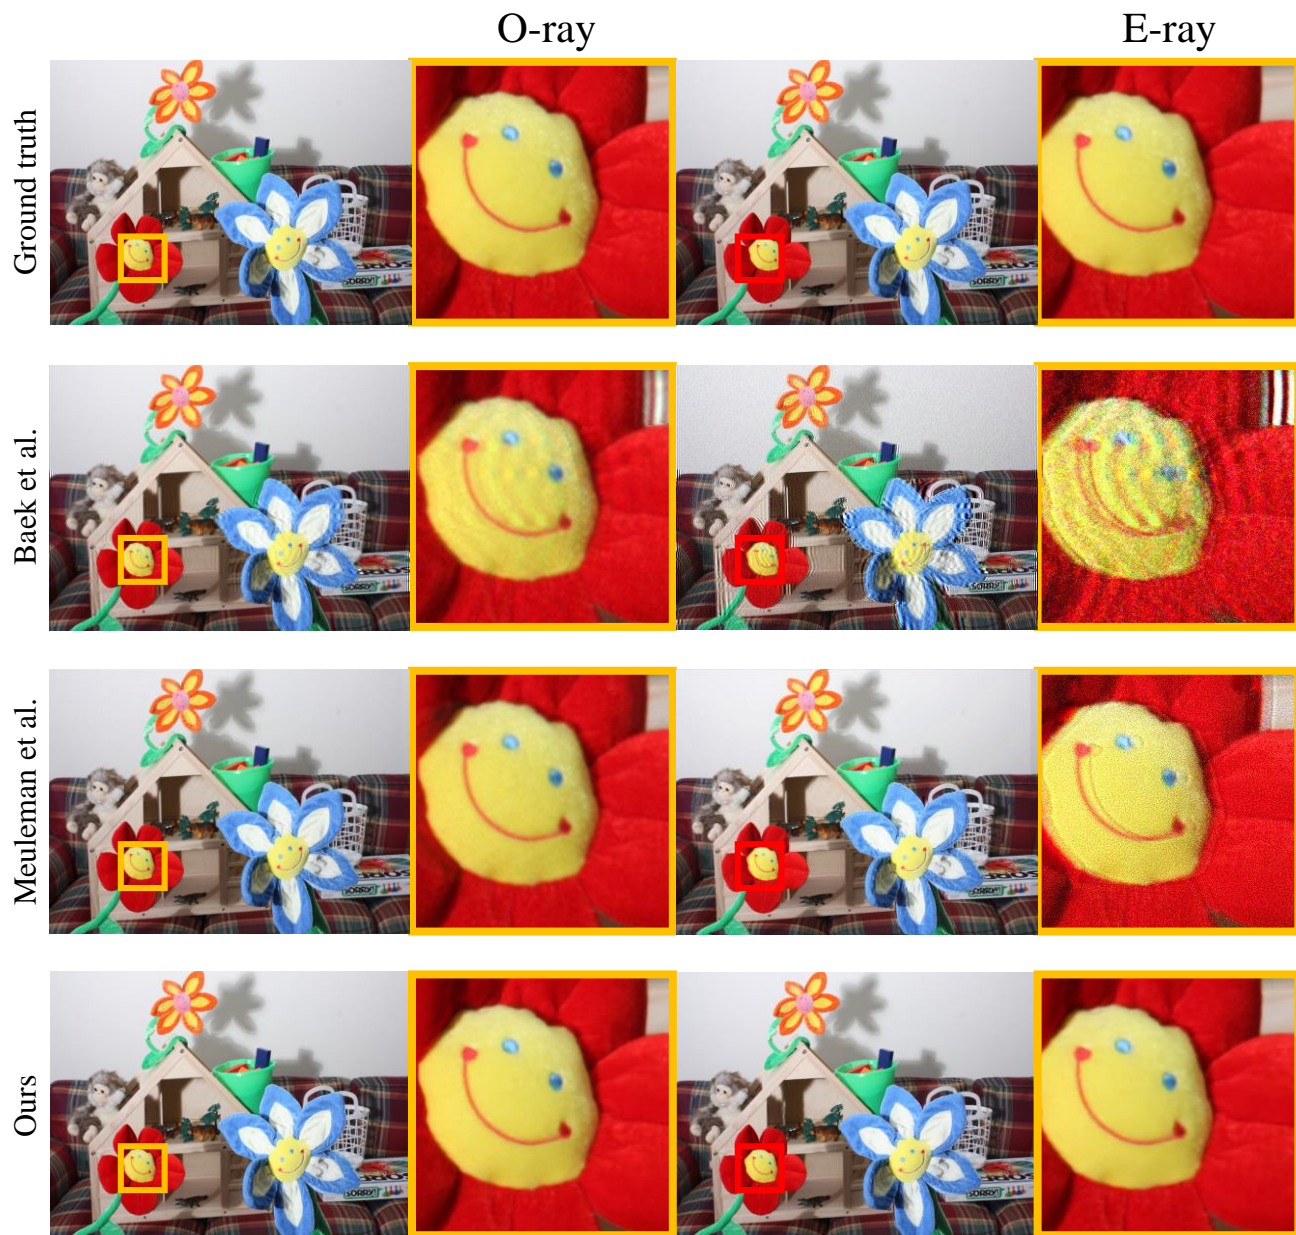

# Comparison of Stereo Image Restoration Results (Synthetic Test Dataset)

| Image ID | Baek et al. |       |        |        | Meuleman et al. |       |        |        | Ours         |              |               |               |
|----------|-------------|-------|--------|--------|-----------------|-------|--------|--------|--------------|--------------|---------------|---------------|
|          | PSNR (dB)   |       | SSIM   |        | PSNR (dB)       |       | SSIM   |        | PSNR (dB)    |              | SSIM          |               |
|          | O-ray       | E-ray | O-ray  | E-ray  | O-ray           | E-ray | O-ray  | E-ray  | O-ray        | E-ray        | O-ray         | E-ray         |
| 0        | 26.19       | 14.64 | 0.7797 | 0.1261 | 32.44           | 19.51 | 0.9115 | 0.2192 | <b>38.37</b> | <b>31.90</b> | <b>0.9638</b> | <b>0.9343</b> |
| 1        | 25.80       | 14.36 | 0.7881 | 0.1566 | 31.99           | 19.28 | 0.9176 | 0.2683 | <b>36.71</b> | <b>28.76</b> | <b>0.9589</b> | <b>0.9128</b> |
| 2        | 26.53       | 14.85 | 0.7640 | 0.1301 | 33.50           | 19.92 | 0.9155 | 0.2456 | <b>38.38</b> | <b>31.93</b> | <b>0.9611</b> | <b>0.9252</b> |
| 3        | 28.18       | 16.06 | 0.8147 | 0.1095 | 35.24           | 20.65 | 0.9134 | 0.1885 | <b>39.89</b> | <b>36.59</b> | <b>0.9575</b> | <b>0.9379</b> |
| 4        | 28.75       | 16.26 | 0.8215 | 0.1105 | 35.65           | 20.50 | 0.9207 | 0.1849 | <b>40.81</b> | <b>36.91</b> | <b>0.9643</b> | <b>0.9481</b> |
| 5        | 27.19       | 15.35 | 0.7919 | 0.1219 | 34.38           | 20.33 | 0.9119 | 0.2243 | <b>38.67</b> | <b>32.96</b> | <b>0.9556</b> | <b>0.9154</b> |
| 6        | 26.99       | 15.17 | 0.8050 | 0.1393 | 33.96           | 20.08 | 0.9222 | 0.2348 | <b>39.13</b> | <b>33.13</b> | <b>0.9671</b> | <b>0.9431</b> |
| 7        | 28.08       | 15.97 | 0.7738 | 0.1469 | 33.70           | 20.03 | 0.8966 | 0.2383 | <b>38.80</b> | <b>34.98</b> | <b>0.9564</b> | <b>0.9314</b> |
| 8        | 32.75       | 18.22 | 0.8443 | 0.1064 | 36.13           | 20.53 | 0.9250 | 0.1602 | <b>42.61</b> | <b>39.32</b> | <b>0.9715</b> | <b>0.9633</b> |
| 9        | 29.17       | 16.64 | 0.8259 | 0.1275 | 34.03           | 20.15 | 0.9113 | 0.1933 | <b>39.42</b> | <b>33.22</b> | <b>0.9629</b> | <b>0.9233</b> |
| 10       | 28.08       | 15.99 | 0.7966 | 0.1388 | 33.02           | 19.73 | 0.9120 | 0.2466 | <b>37.59</b> | <b>31.07</b> | <b>0.9501</b> | <b>0.8956</b> |
| 11       | 27.74       | 15.61 | 0.8454 | 0.1325 | 36.08           | 20.65 | 0.9251 | 0.1944 | <b>42.02</b> | <b>39.02</b> | <b>0.9698</b> | <b>0.9632</b> |
| 12       | 29.39       | 16.74 | 0.8045 | 0.1416 | 33.95           | 20.01 | 0.9178 | 0.2420 | <b>39.26</b> | <b>34.79</b> | <b>0.9560</b> | <b>0.9375</b> |
| 13       | 30.18       | 17.01 | 0.8287 | 0.0975 | 36.61           | 20.63 | 0.9275 | 0.1671 | <b>42.38</b> | <b>37.52</b> | <b>0.9710</b> | <b>0.9561</b> |
| 14       | 29.91       | 17.05 | 0.8066 | 0.1321 | 33.88           | 20.00 | 0.9132 | 0.2210 | <b>39.21</b> | <b>34.49</b> | <b>0.9556</b> | <b>0.9273</b> |
| 15       | 29.81       | 16.86 | 0.8221 | 0.1144 | 35.56           | 20.40 | 0.9259 | 0.1801 | <b>41.71</b> | <b>35.82</b> | <b>0.9705</b> | <b>0.9567</b> |
| 16       | 26.52       | 15.12 | 0.7913 | 0.1454 | 31.38           | 19.45 | 0.9216 | 0.2422 | <b>38.63</b> | <b>30.58</b> | <b>0.9723</b> | <b>0.9406</b> |
| 17       | 29.21       | 16.50 | 0.8232 | 0.0929 | 35.24           | 20.27 | 0.9220 | 0.1464 | <b>43.45</b> | <b>39.64</b> | <b>0.9765</b> | <b>0.9695</b> |
| 18       | 26.28       | 14.92 | 0.7707 | 0.1265 | 30.92           | 19.03 | 0.9027 | 0.2251 | <b>38.44</b> | <b>32.47</b> | <b>0.9741</b> | <b>0.9468</b> |
| 19       | 27.95       | 15.77 | 0.8141 | 0.1123 | 34.87           | 20.28 | 0.9162 | 0.1833 | <b>40.76</b> | <b>35.83</b> | <b>0.9645</b> | <b>0.9516</b> |
| 20       | 28.08       | 15.98 | 0.8159 | 0.1156 | 34.02           | 20.20 | 0.9098 | 0.1823 | <b>40.28</b> | <b>35.49</b> | <b>0.9614</b> | <b>0.9399</b> |
| 21       | 28.58       | 16.31 | 0.8001 | 0.1107 | 35.21           | 20.64 | 0.8991 | 0.1778 | <b>39.59</b> | <b>35.34</b> | <b>0.9435</b> | <b>0.9165</b> |
| 22       | 29.06       | 16.45 | 0.8164 | 0.1113 | 34.52           | 20.06 | 0.9254 | 0.1988 | <b>39.35</b> | <b>32.00</b> | <b>0.9679</b> | <b>0.9350</b> |
| Average  | 28.28       | 15.99 | 0.8063 | 0.1238 | 34.19           | 20.10 | 0.9158 | 0.2072 | <b>39.80</b> | <b>34.51</b> | <b>0.9631</b> | <b>0.9379</b> |

# Comparison of Real-Image Results (using Our Prototype)

Double refraction

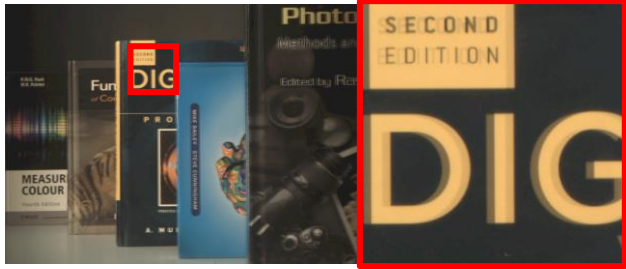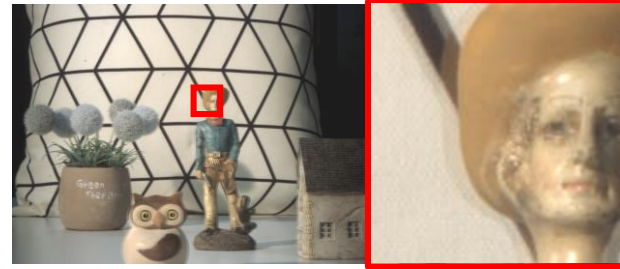

O-ray

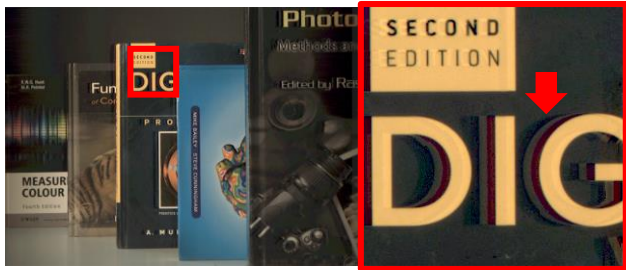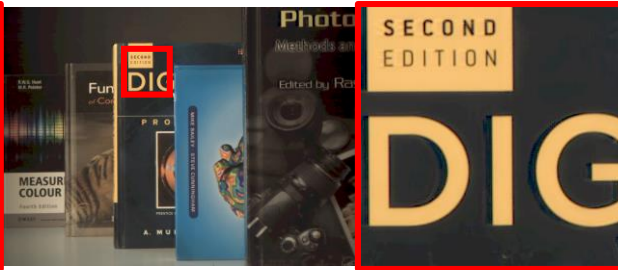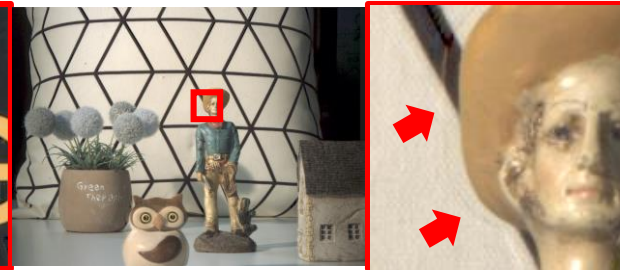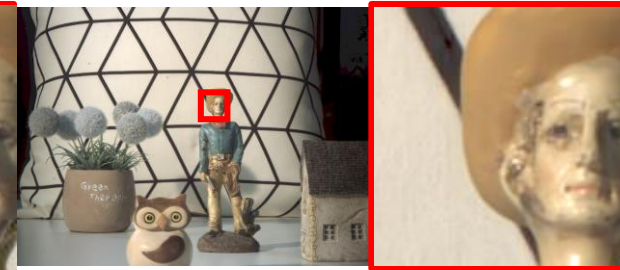

E-ray

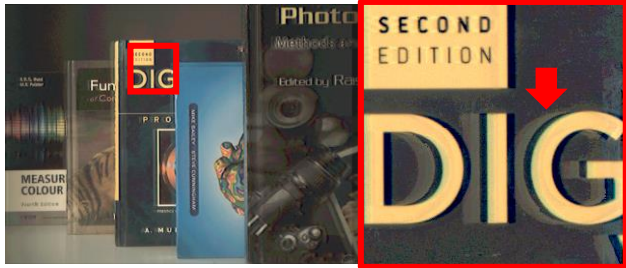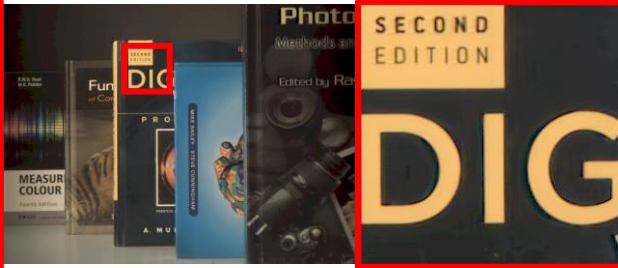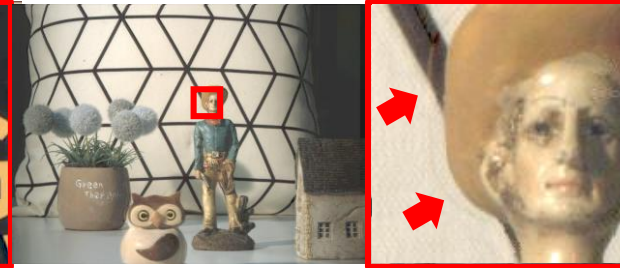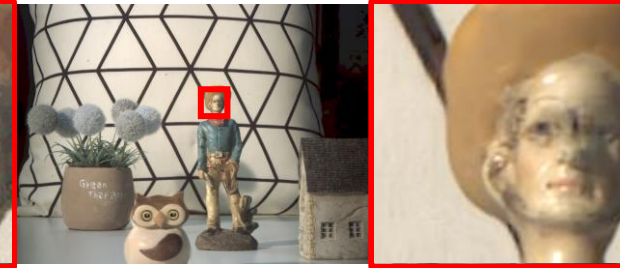

Meuleman et al.

Our method

Meuleman et al.

Our method

# Comparison of Real-Image Results (using Our Prototype)

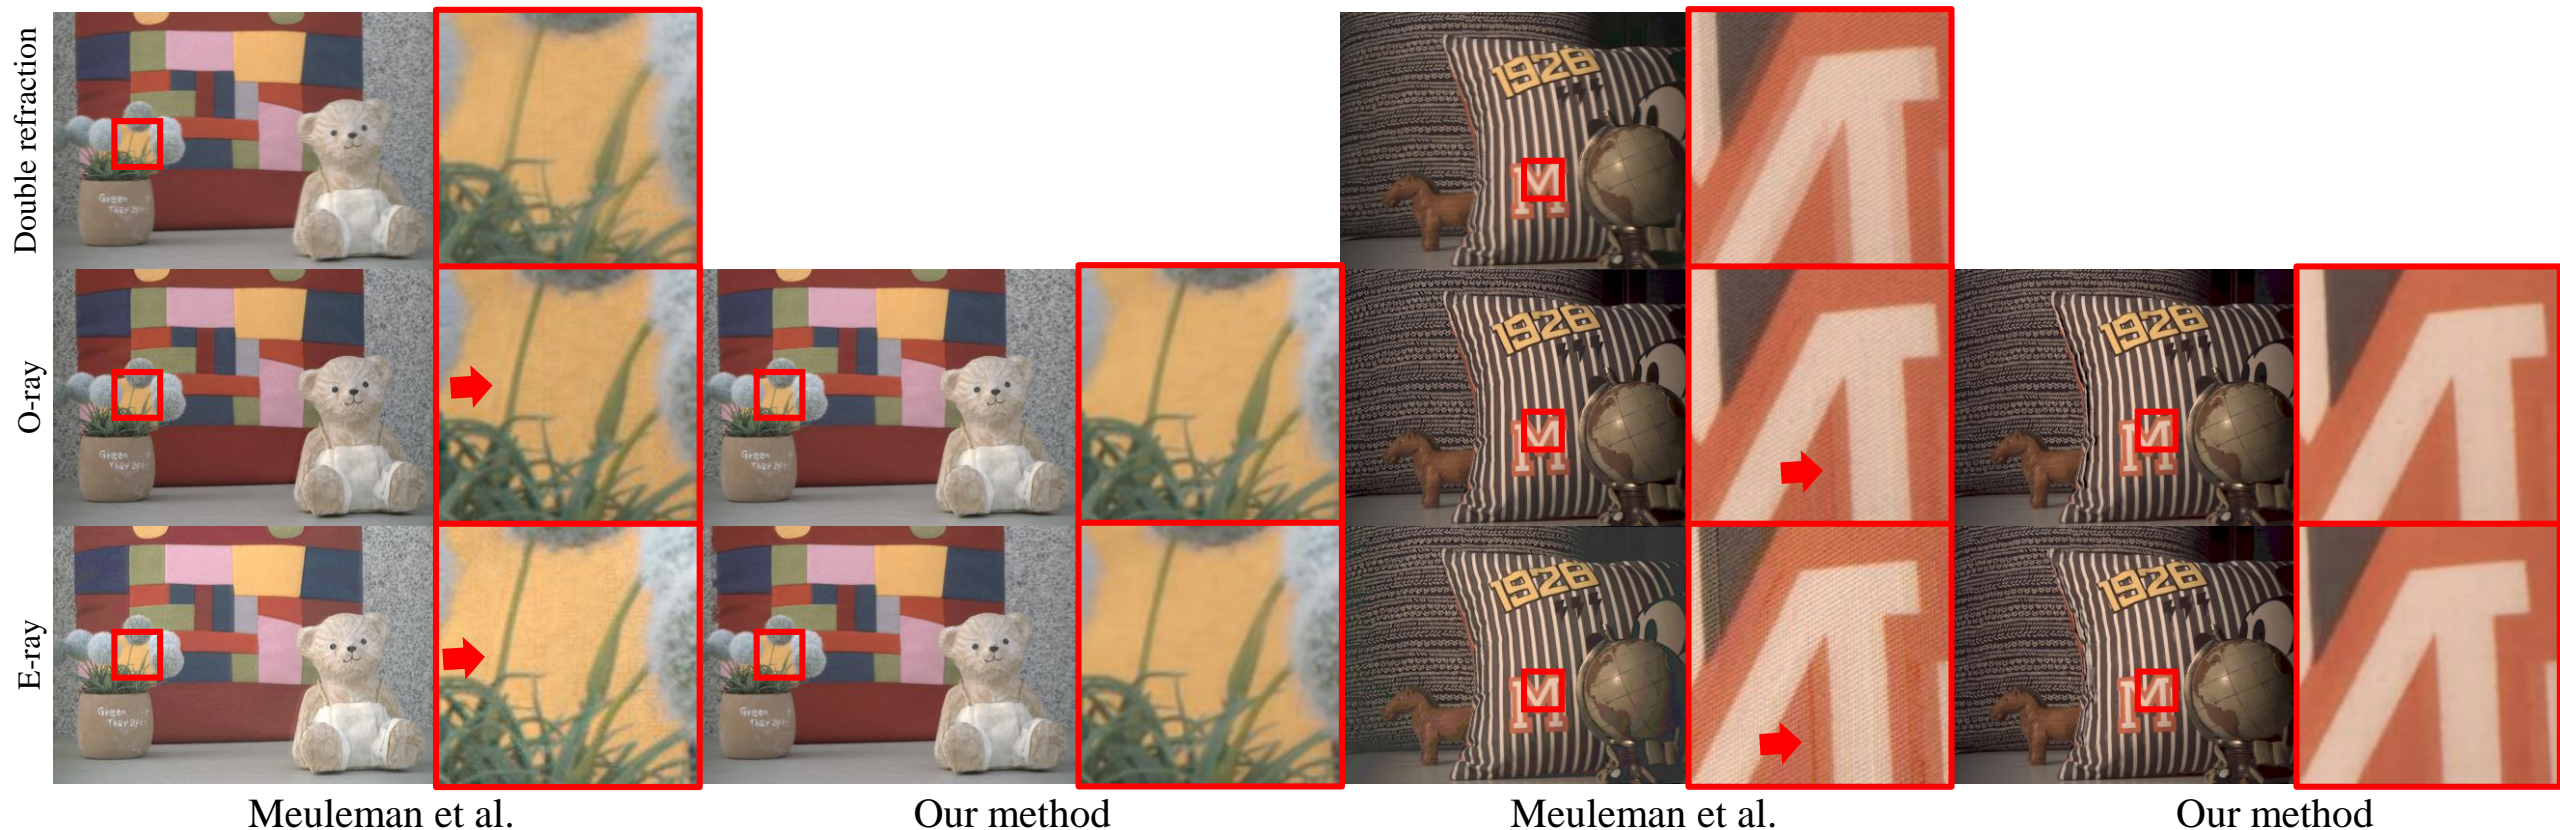

# Robustness

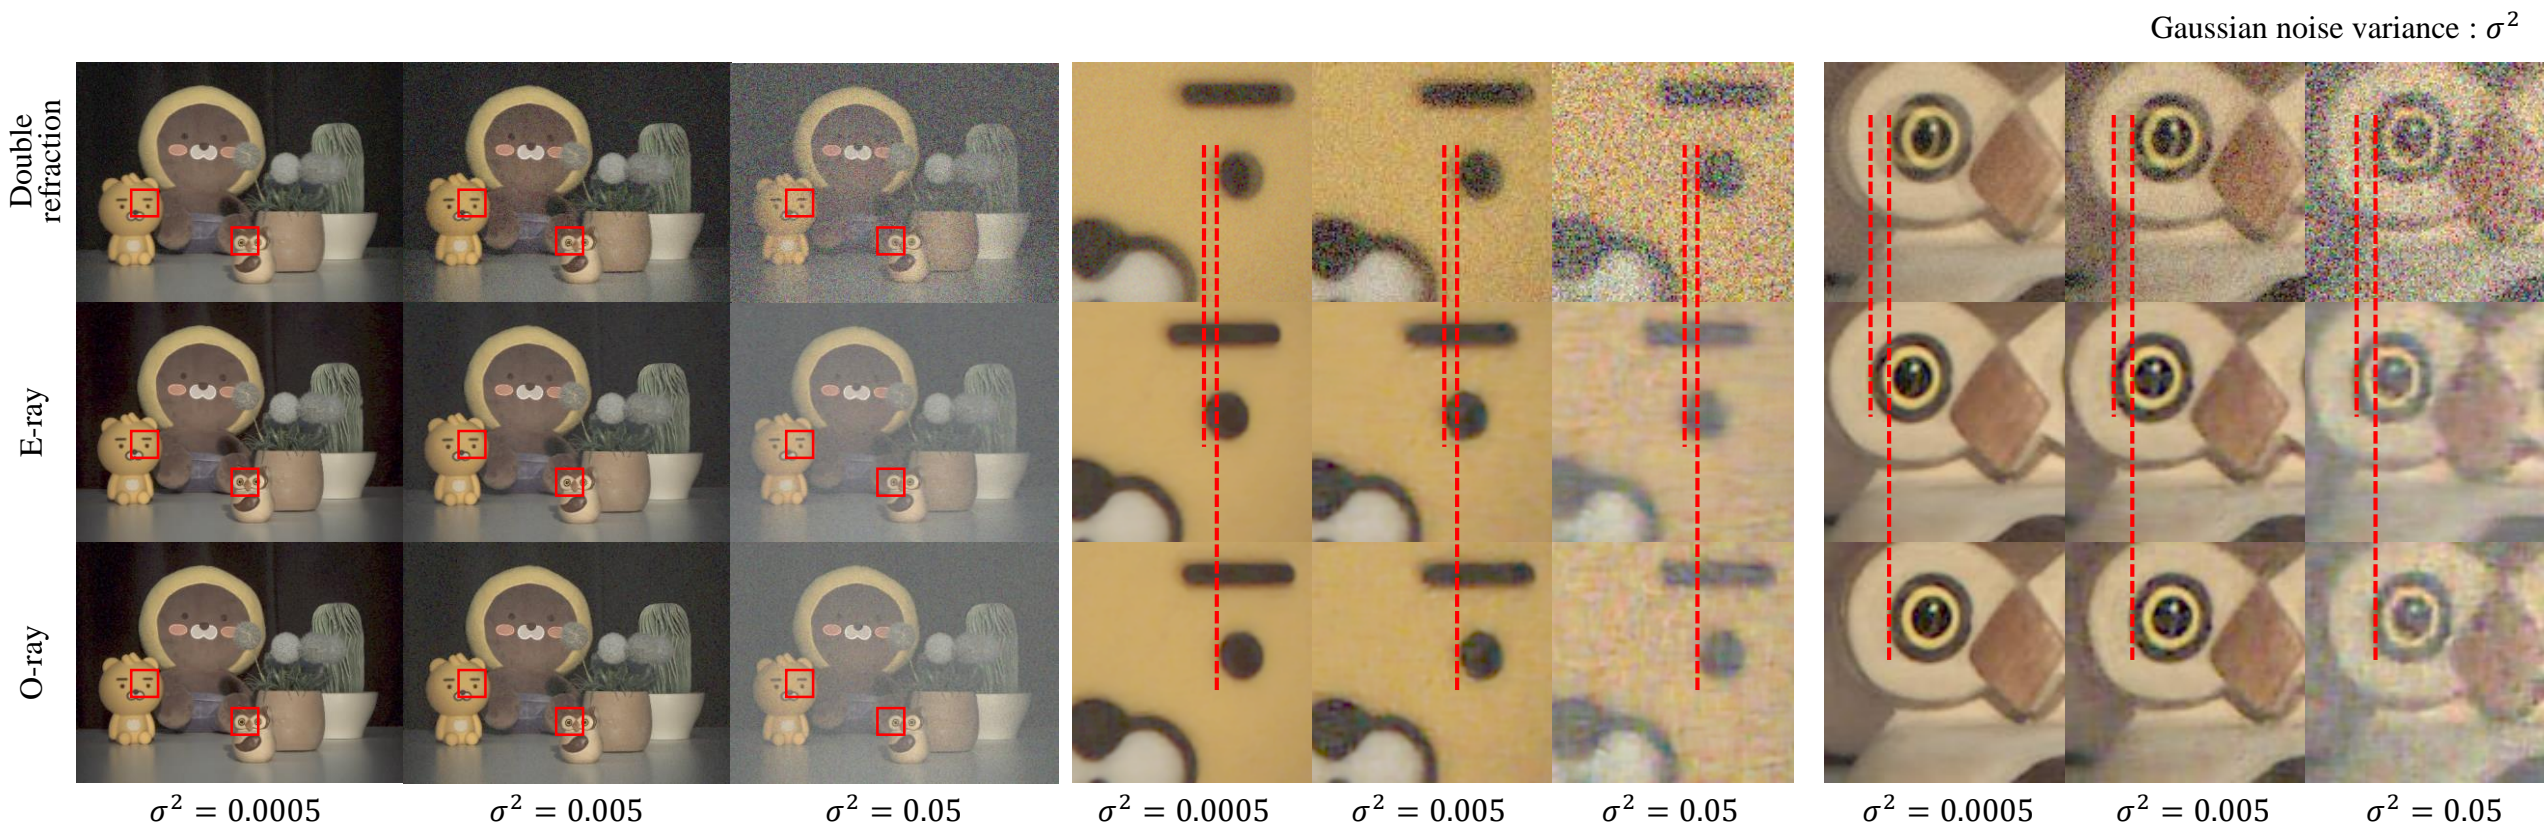

Supplement: Supplementary file 2 [file 02151-supple-2.pdf › 02151-supple-2.pdf]
